# Supplementary material
Source: publisher figshare collection journal article supplement (https://acs.figshare.com/ndownloader/files/5732946)
Supplement: Supplementary file 1 [file 5732946]

## Supporting information

### Cross-Modulation of Physico-Chemical Character of Aglycones in Dinucleoside (3'→5') monophosphates by the Nearest Neighbor Interaction in the Stacked State

S. Acharya, P. Acharya, A. Földesi and J. Chattopadhyaya\*

Department of Bioorganic Chemistry, Box 581, Biomedical Center,  
Uppsala University, S-751 23 Uppsala, Sweden

E-mail: jyoti@bioorgchem.uu.se, Fax: +4618-554495, Tel: +4618-4714577

#### Table of contents

1. **Legends** for Figures S1 – S5.
2. **Figure S1:** Plots of aromatic proton chemical shift as a function of pH for compounds **1 – 10**.
3. **Figure S2:** Hill plot analysis of the pH-dependent chemical shifts of aromatic protons for compounds **1 – 10** to calculate the  $pK_a$  of nucleobase.
4. **Figure S3:** Plots of fraction protonation or deprotonation as a function of pH for compounds **1 – 10**.
5. **Figure S4:** chemical shift change over the pH-range,  $\Delta\delta$  [ $\delta_N - \delta_{P/D}$ , in ppm; N, P, D stands for neutral, protonated and deprotonated state], showing a direct evidence for atom –  $\pi\sigma$  interaction between the nearest neighbor nucleobases.
6. **Figure S5:** Bar plots showing dimerisation shift of the aromatic protons of compounds **1 – 6**.
7. **Table S1:** Endocyclic  $^3J_{HH}$ , percentage population of N-type pseudorotamer (% N) and corresponding free energy (  $\Delta G_{N/S(298\text{ K})}^\circ$  ) and stacking free energy (  $\Delta G_{Stacking}^\circ$  ) from  $^1\text{H}$  NMR at 298 K for **1 – 10** at acidic (pH = 1.9), neutral (pH = 6.6) and alkaline (pH = 10.3) state.

8. **Table S2:** Pseudorotational parameters determined by PSEUROT (v5.4) calculations based on  $^1\text{H}$  NMR derived endocyclic  $^3J_{\text{HH}}$  at acidic ( $\text{pH} = 1.9$ ), neutral ( $\text{pH} = 6.6$ ) and alkaline ( $\text{pH} = 10.3$ ) state at 298 K for **1 – 10**.
9. **Table S3:** Dimerisation shift ( $\delta_{\text{NpEt}} - \delta_{\text{NpN'}}$ , in ppm) estimated from  $^1\text{H}$  chemical shift at 298 K for aromatic protons of monomers, **7 – 10**, in comparison with dimers, **1 – 6**, at acidic ( $\text{pH} = 1.9$ ), neutral ( $\text{pH} = 6.6$ ) and alkaline ( $\text{pH} = 10.3$ ) state.

**Legends for Figure S1:**

**Figure S1a:** pH dependant  $^1\text{H}$  chemical shift of aromatic protons (H8A, H2A, H8G) of ApG within the pH values of  $0.03 \leq \text{pH} \leq 7.56$ . Chemical shift variations at 63 different pH values ( $0.03 \leq \text{pH} \leq 7.56$ ) have been measured in an interval of 0.1 – 0.2 pH units to obtain the sigmoidal curves.  $\text{pK}_a$  values obtained from Hill plot of  $\delta\text{H8A}$ ,  $\delta\text{H2A}$  and  $\delta\text{H8G}$  are shown in the respective graphs.

**Figure S1b:** pH dependant  $^1\text{H}$  chemical shift of aromatic protons (H8A, H2A, H8G) of ApG within the pH values of  $7.56 \leq \text{pH} \leq 11.63$ . Chemical shift variations at 30 different pH values ( $7.56 \leq \text{pH} \leq 11.63$ ) have been measured in an interval of 0.1 – 0.2 pH units to obtain the sigmoidal curves.  $\text{pK}_a$  values obtained from Hill plot of  $\delta\text{H8A}$ ,  $\delta\text{H2A}$  and  $\delta\text{H8G}$  are shown in the respective graphs.

**Figure S1c:** pH dependant  $^1\text{H}$  chemical shift of aromatic protons (H8A, H2A, H8G) of GpA within the pH values of  $0.12 \leq \text{pH} \leq 7.29$ . Chemical shift variations at 61 different pH values ( $0.12 \leq \text{pH} \leq 7.29$ ) have been measured in an interval of 0.1 – 0.2 pH units to obtain the sigmoidal curves.  $\text{pK}_a$  values obtained from Hill plot of  $\delta\text{H8A}$ ,  $\delta\text{H2A}$  and  $\delta\text{H8G}$  are shown in the respective graphs.

**Figure S1d:** pH dependant  $^1\text{H}$  chemical shift of aromatic protons (H8A, H8G) of GpA within the pH values of  $6.93 \leq \text{pH} \leq 10.70$ . Chemical shift variations at 35 different pH

values ( $6.93 \leq \text{pH} \leq 10.70$ ) have been measured in an interval of 0.1 – 0.2 pH units to obtain the sigmoidal curves.  $\text{pK}_a$  values obtained from Hill plot of  $\delta\text{H8A}$  and  $\delta\text{H8G}$  are shown in the respective graphs. H2A of GpA did not show any significant change in chemical shift with pH hence plot for H2A is not shown.

**Figure S1e:** pH dependant  $^1\text{H}$  chemical shift of aromatic protons (H6U, H5U, H6C, H5C) of CpU within the pH values of  $1.87 \leq \text{pH} \leq 6.92$ . Chemical shift variations at 35 different pH values ( $1.87 \leq \text{pH} \leq 6.92$ ) have been measured in an interval of 0.1 – 0.2 pH units to obtain the sigmoidal curves.  $\text{pK}_a$  values obtained from Hill plot of  $\delta\text{H6U}$ ,  $\delta\text{H5U}$ ,  $\delta\text{H6C}$  and  $\delta\text{H5C}$  are shown in the respective graphs.

**Figure S1f:** pH dependant  $^1\text{H}$  chemical shift of aromatic protons (H6U, H5U, H6C, H5C) of CpU within the pH values of  $6.92 \leq \text{pH} \leq 11.32$ . Chemical shift variations at 25 different pH values ( $6.92 \leq \text{pH} \leq 11.32$ ) have been measured in an interval of 0.1 – 0.2 pH units to obtain the sigmoidal curves.  $\text{pK}_a$  values obtained from Hill plot of  $\delta\text{H6U}$ ,  $\delta\text{H5U}$ ,  $\delta\text{H6C}$  and  $\delta\text{H5C}$  are shown in the respective graphs.

**Figure S1g:** pH dependant  $^1\text{H}$  chemical shift of aromatic protons (H5U, H6C, H5C) of UpC within the pH values of  $1.97 \leq \text{pH} \leq 6.79$ . Chemical shift variations at 25 different pH values ( $1.97 \leq \text{pH} \leq 6.79$ ) have been measured in an interval of 0.1 – 0.2 pH units to obtain the sigmoidal curves.  $\text{pK}_a$  values obtained from Hill plot of  $\delta\text{H5U}$ ,  $\delta\text{H6C}$  and  $\delta\text{H5C}$  are shown in the respective graphs. H6U of UpC did not show any significant change in chemical shift with pH hence plot for H6U is not shown.

**Figure S1h:** pH dependant  $^1\text{H}$  chemical shift of aromatic protons (H6U, H5U, H6C, H5C) of UpC within the pH values of  $6.79 \leq \text{pH} \leq 11.42$ . Chemical shift variations at 30 different pH values ( $6.79 \leq \text{pH} \leq 11.42$ ) have been measured in an interval of 0.1 – 0.2 pH units to obtain the sigmoidal curves.  $\text{pK}_a$  values obtained from Hill plot of  $\delta\text{H6U}$ ,  $\delta\text{H5U}$ ,  $\delta\text{H6C}$  and  $\delta\text{H5C}$  are shown in the respective graphs.

**Figure S1i:** pH dependant  $^1\text{H}$  chemical shift of aromatic protons (H8A, H2A, H6U, H5U) of UpA within the pH values of  $1.11 \leq \text{pH} \leq 6.98$ . Chemical shift variations at 43 different pH values ( $1.11 \leq \text{pH} \leq 6.98$ ) have been measured in an interval of 0.1 – 0.2 pH units to obtain the sigmoidal curves.  $\text{pK}_a$  values obtained from Hill plot of H8A, H2A, H6U and H5U are shown in the respective graphs.

**Figure S1j:** pH dependant  $^1\text{H}$  chemical shift of aromatic protons (H6U, H5U) of UpA within the pH values of  $6.6 \leq \text{pH} \leq 11.10$ . Chemical shift variations at 47 different pH values ( $6.6 \leq \text{pH} \leq 11.10$ ) have been measured in an interval of 0.1 – 0.2 pH units to obtain the sigmoidal curves.  $\text{pK}_a$  values obtained from Hill plot of H6U and H5U are shown in the respective graphs. H8A and H2A of UpA did not show any significant change in chemical shift with pH hence plots for H8A and H2A are not shown.

**Figure S1k:** pH dependant  $^1\text{H}$  chemical shift of aromatic protons (H8A, H2A, H6U, H5U) of ApU within the pH values of  $1.35 \leq \text{pH} \leq 6.99$ . Chemical shift variations at 36 different pH values ( $1.35 \leq \text{pH} \leq 6.99$ ) have been measured in an interval of 0.1 – 0.2 pH units to obtain the sigmoidal curves.  $\text{pK}_a$  values obtained from Hill plot of H8A, H2A, H6U and H5U are shown in the respective graphs.

**Figure 1l:** pH dependant  $^1\text{H}$  chemical shift of aromatic protons (H8A,H2A,H6U,H5U) of ApU within the pH values of  $6.99 \leq \text{pH} \leq 10.96$ . Chemical shift variations at 39 different pH values ( $6.99 \leq \text{pH} \leq 10.96$ ) have been measured in an interval of 0.1 – 0.2 pH units to obtain the sigmoidal curves in all cases.  $\text{pK}_a$  values obtained from Hill plot of H8A, H2A, H6U and H5U are shown in the respective graphs.

**Figure S1m:** pH dependant  $^1\text{H}$  chemical shift of aromatic protons (H8A, H2A) of ApEt within the pH values of  $1.62 \leq \text{pH} \leq 6.38$ . Chemical shift variations at 18 different pH values ( $1.62 \leq \text{pH} \leq 6.38$ ) have been measured in an interval of 0.1 – 0.2 pH units to obtain the sigmoidal curves.  $\text{pK}_a$  values obtained from Hill plot of H8A and H2A are shown in the respective graphs.

**Figure S1n:** pH dependant  $^1\text{H}$  chemical shift of aromatic proton (H8G) of GpEt within the pH values of  $6.89 \leq \text{pH} \leq 11.00$ . Chemical shift variations at 15 different pH values ( $6.89 \leq \text{pH} \leq 11.0$ ) have been measured in an interval of 0.1 – 0.2 pH units to obtain the sigmoidal curve.  $\text{pK}_a$  value obtained from Hill plot of H8G is shown in the respective graph.

**Figure S1o:** pH dependant  $^1\text{H}$  chemical shift of aromatic protons (H6U, H5U) of UpEt within the pH values of  $6.65 \leq \text{pH} \leq 11.44$ . Chemical shift variations at 23 different pH values ( $6.65 \leq \text{pH} \leq 11.44$ ) have been measured in an interval of 0.1 – 0.2 pH units to obtain the sigmoidal curves.  $\text{pK}_a$  values obtained from Hill plot of H6U and H5U are shown in the respective graphs.

**Figure S1p:** pH dependant  $^1\text{H}$  chemical shift of aromatic protons (H6C, H5C) of CpEt within the pH values of  $1.66 \leq \text{pH} \leq 6.39$ . Chemical shift variations at 22 different pH values ( $1.66 \leq \text{pH} \leq 6.39$ ) have been measured in an interval of 0.1 – 0.2 pH units to obtain the sigmoidal curves.  $\text{pK}_a$  values obtained from Hill plot of H6C and H5C are shown in the respective graphs.

#### **Legends for Figure S2:**

**Figure S2a:** The Hill plots for  $\delta\text{H8A}$ ,  $\delta\text{H2A}$ ,  $\delta\text{H8G}$  of ApG in the  $0.03 \leq \text{pH} \leq 7.56$ .  $\Delta_T$  for H8A ( $0.03 \leq \text{pH} \leq 7.56$ ) = 0.297 ppm. The plot of  $\log((\Delta_T - \Delta)/\Delta)$  vs. pH gave a straight line ( $R = 1.00$ ) with a slope = 1.34 ( $\sigma = 0.04$ ) and  $\text{pK}_a = 2.88$  ( $\sigma = 0.02$ ).  $\Delta_T$  for H2A ( $0.03 \leq \text{pH} \leq 7.56$ ) = 0.322 ppm. The plot of  $\log((\Delta_T - \Delta)/\Delta)$  vs. pH gave a straight line ( $R = 0.99$ ) with a slope = 1.36 ( $\sigma = 0.04$ ) and  $\text{pK}_a = 2.83$  ( $\sigma = 0.02$ ).  $\Delta_T$  for H8G ( $0.03 \leq \text{pH} \leq 7.56$ ) = 1.124 ppm. The plot of  $\log((\Delta_T - \Delta)/\Delta)$  vs. pH gave a straight line ( $R = 0.99$ ) with a slope = 0.92 ( $\sigma = 0.04$ ) and  $\text{pK}_a = 1.64$  ( $\sigma = 0.02$ ). The values of correlation coefficient  $R$ ,  $\text{pK}_a$  obtained from Hill plot analysis, and the Hill slope values of  $\delta\text{H8A}$ ,  $\delta\text{H2A}$ ,  $\delta\text{H8G}$  are shown in the respective graphs.

**Figure S2b:** The Hill plots for  $\delta\text{H8A}$ ,  $\delta\text{H2A}$ ,  $\delta\text{H8G}$  of ApG in the  $7.56 \leq \text{pH} \leq 11.63$ .  $\Delta_T$  for H8A ( $7.56 \leq \text{pH} \leq 11.63$ ) = 0.009 ppm. The plot of  $\log((\Delta_T - \Delta)/\Delta)$  vs. pH gave a straight line ( $R = 0.99$ ) with a slope = 0.97 ( $\sigma = 0.04$ ) and  $\text{pK}_a = 9.71$  ( $\sigma = 0.02$ ).  $\Delta_T$  for H2A ( $7.56 \leq \text{pH} \leq 11.63$ ) = 0.032 ppm. The plot of  $\log((\Delta_T - \Delta)/\Delta)$  vs. pH gave a straight line ( $R = 0.99$ ) with a slope = 0.98 ( $\sigma = 0.04$ ) and  $\text{pK}_a = 9.65$  ( $\sigma = 0.02$ ).  $\Delta_T$  for H8G ( $7.56 \leq \text{pH} \leq 11.63$ ) = 0.068 ppm. The plot of  $\log((\Delta_T - \Delta)/\Delta)$  vs. pH gave a straight line ( $R = 1.00$ ) with a slope = 0.92 ( $\sigma = 0.03$ ) and  $\text{pK}_a = 9.42$  ( $\sigma = 0.01$ ). The values of correlation coefficient  $R$ ,  $\text{pK}_a$  obtained from Hill plot analysis, and the Hill slope values of  $\delta\text{H8A}$ ,  $\delta\text{H2A}$ ,  $\delta\text{H8G}$  are shown in the respective graphs.

**Figure S2c:** The Hill plots for  $\delta\text{H8A}$ ,  $\delta\text{H2A}$ ,  $\delta\text{H8G}$  of GpA in the  $0.12 \leq \text{pH} \leq 7.29$ .  $\Delta_T$  for H8A ( $0.12 \leq \text{pH} \leq 7.29$ ) = 0.205 ppm. The plot of  $\log((\Delta_T - \Delta)/\Delta)$  vs. pH gave a straight line ( $R = 0.99$ ) with a slope = 1.02 ( $\sigma = 0.02$ ) and  $\text{pK}_a = 3.22$  ( $\sigma = 0.01$ ).  $\Delta_T$  for H2A ( $0.12 \leq \text{pH} \leq 7.29$ ) = 0.301 ppm. The plot of  $\log((\Delta_T - \Delta)/\Delta)$  vs. pH gave a straight line ( $R = 1.00$ ) with a slope = 1.26 ( $\sigma = 0.02$ ) and  $\text{pK}_a = 2.94$  ( $\sigma = 0.01$ ).  $\Delta_T$  for H8G ( $0.12 \leq \text{pH} \leq 7.29$ ) = 1.184 ppm. The plot of  $\log((\Delta_T - \Delta)/\Delta)$  vs. pH gave a straight line ( $R = 1.00$ ) with a slope = 1.03 ( $\sigma = 0.03$ ) and  $\text{pK}_a = 1.68$  ( $\sigma = 0.01$ ). The values of correlation coefficient  $R$ ,  $\text{pK}_a$  obtained from Hill plot analysis, and the Hill slope values of  $\delta\text{H8A}$ ,  $\delta\text{H2A}$ ,  $\delta\text{H8G}$  are shown in the respective graphs.

**Figure S2d:** The Hill plots for  $\delta\text{H8A}$  and  $\delta\text{H8G}$  of GpA in the  $6.93 \leq \text{pH} \leq 10.7$ .  $\Delta_T$  for H8A ( $6.93 \leq \text{pH} \leq 10.7$ ) = 0.056 ppm. The plot of  $\log((\Delta_T - \Delta)/\Delta)$  vs. pH gave a straight line ( $R = 0.99$ ) with a slope = 0.96 ( $\sigma = 0.04$ ) and  $\text{pK}_a = 9.16$  ( $\sigma = 0.02$ ).  $\Delta_T$  for H8G ( $6.93 \leq \text{pH} \leq 10.7$ ) = 0.141 ppm. The plot of  $\log((\Delta_T - \Delta)/\Delta)$  vs. pH gave a straight line ( $R = 0.99$ ) with a slope = 1.00 ( $\sigma = 0.04$ ) and  $\text{pK}_a = 9.17$  ( $\sigma = 0.02$ ). The values of correlation coefficient  $R$ ,  $\text{pK}_a$  obtained from Hill plot analysis, and the Hill slope values of  $\delta\text{H8A}$ ,  $\delta\text{H2A}$ ,  $\delta\text{H8G}$  are shown in the respective graphs. H2A of GpA did not show any significant change in  $\log((\Delta_T - \Delta)/\Delta)$  with pH, hence Hill plot for H2A was not done.

**Figure S2e:** The Hill plots for  $\delta\text{H6U}$ ,  $\delta\text{H5U}$ ,  $\delta\text{H6C}$ ,  $\delta\text{H5C}$  of CpU in the  $1.87 \leq \text{pH} \leq 6.92$ .  $\Delta_{\text{T}}$  for H6U ( $1.87 \leq \text{pH} \leq 6.92$ ) = 0.013 ppm. The plot of  $\log((\Delta_{\text{T}} - \Delta)/\Delta)$  vs. pH gave a straight line ( $R = 0.97$ ) with a slope = 0.96 ( $\sigma = 0.07$ ) and  $\text{pK}_{\text{a}} = 3.48$  ( $\sigma = 0.03$ ).  $\Delta_{\text{T}}$  for H5U ( $1.87 \leq \text{pH} \leq 6.92$ ) = 0.073 ppm. The plot of  $\log((\Delta_{\text{T}} - \Delta)/\Delta)$  vs. pH gave a straight line ( $R = 0.99$ ) with a slope = 1.05 ( $\sigma = 0.03$ ) and  $\text{pK}_{\text{a}} = 3.58$  ( $\sigma = 0.02$ ).  $\Delta_{\text{T}}$  for H6C ( $1.87 \leq \text{pH} \leq 6.92$ ) = 0.289 ppm. The plot of  $\log((\Delta_{\text{T}} - \Delta)/\Delta)$  vs. pH gave a straight line ( $R = 0.99$ ) with a slope = 0.99 ( $\sigma = 0.03$ ) and  $\text{pK}_{\text{a}} = 3.56$  ( $\sigma = 0.01$ ).  $\Delta_{\text{T}}$  for H5C ( $1.87 \leq \text{pH} \leq 6.92$ ) = 0.262 ppm. The plot of  $\log((\Delta_{\text{T}} - \Delta)/\Delta)$  vs. pH gave a straight line ( $R = 0.99$ ) with a slope = 1.01 ( $\sigma = 0.03$ ) and  $\text{pK}_{\text{a}} = 3.58$  ( $\sigma = 0.01$ ). The values of correlation coefficient  $R$ ,  $\text{pK}_{\text{a}}$  obtained from Hill plot analysis, and the Hill slope values of  $\delta\text{H6U}$ ,  $\delta\text{H5U}$ ,  $\delta\text{H6C}$ ,  $\delta\text{H5C}$  are shown in the respective graphs.

**Figure S2f:** The Hill plots for  $\delta\text{H6U}$ ,  $\delta\text{H5U}$ ,  $\delta\text{H6C}$ ,  $\delta\text{H5C}$  of CpU in the  $6.92 \leq \text{pH} \leq 11.32$ .  $\Delta_{\text{T}}$  for H6U ( $6.92 \leq \text{pH} \leq 11.32$ ) = 0.162 ppm. The plot of  $\log((\Delta_{\text{T}} - \Delta)/\Delta)$  vs. pH gave a straight line ( $R = 0.99$ ) with a slope = 1.06 ( $\sigma = 0.05$ ) and  $\text{pK}_{\text{a}} = 9.21$  ( $\sigma = 0.02$ ).  $\Delta_{\text{T}}$  for H5U ( $6.92 \leq \text{pH} \leq 11.32$ ) = 0.059 ppm. The plot of  $\log((\Delta_{\text{T}} - \Delta)/\Delta)$  vs. pH gave a straight line ( $R = 0.99$ ) with a slope = 1.01 ( $\sigma = 0.05$ ) and  $\text{pK}_{\text{a}} = 9.25$  ( $\sigma = 0.02$ ).  $\Delta_{\text{T}}$  for H6C ( $6.92 \leq \text{pH} \leq 11.32$ ) = 0.078 ppm. The plot of  $\log((\Delta_{\text{T}} - \Delta)/\Delta)$  vs. pH gave a straight line ( $R = 0.98$ ) with a slope = 1.08 ( $\sigma = 0.07$ ) and  $\text{pK}_{\text{a}} = 9.18$  ( $\sigma = 0.03$ ).  $\Delta_{\text{T}}$  for H5C ( $6.92 \leq \text{pH} \leq 11.32$ ) = 0.053 ppm. The plot of  $\log((\Delta_{\text{T}} - \Delta)/\Delta)$  vs. pH gave a straight line ( $R = 0.99$ ) with a slope = 1.07 ( $\sigma = 0.06$ ) and  $\text{pK}_{\text{a}} = 9.18$  ( $\sigma = 0.03$ ). The values of correlation coefficient  $R$ ,  $\text{pK}_{\text{a}}$  obtained from Hill plot analysis, and the Hill slope values of  $\delta\text{H6U}$ ,  $\delta\text{H5U}$ ,  $\delta\text{H6C}$ ,  $\delta\text{H5C}$  are shown in the respective graphs.

**Figure S2g:** The Hill plots for  $\delta\text{H5U}$ ,  $\delta\text{H6C}$ ,  $\delta\text{H5C}$  of UpC in the  $1.97 \leq \text{pH} \leq 6.79$ .  $\Delta_{\text{T}}$  for H5U ( $1.97 \leq \text{pH} \leq 6.79$ ) = 0.033 ppm. The plot of  $\log((\Delta_{\text{T}} - \Delta)/\Delta)$  vs. pH gave a straight line ( $R = 0.99$ ) with a slope = 0.82 ( $\sigma = 0.04$ ) and  $\text{pK}_{\text{a}} = 3.71$  ( $\sigma = 0.02$ ).  $\Delta_{\text{T}}$  for H6C ( $1.97 \leq \text{pH} \leq 6.79$ ) = 0.242 ppm. The plot of  $\log((\Delta_{\text{T}} - \Delta)/\Delta)$  vs. pH gave a straight line ( $R = 0.99$ ) with a slope = 0.81 ( $\sigma = 0.04$ ) and  $\text{pK}_{\text{a}} = 3.71$  ( $\sigma = 0.02$ ).  $\Delta_{\text{T}}$  for H5C ( $1.97 \leq \text{pH} \leq 6.79$ ) = 0.247 ppm. The plot of  $\log((\Delta_{\text{T}} - \Delta)/\Delta)$  vs. pH gave a straight line ( $R = 0.99$ ) with a slope = 0.82 ( $\sigma = 0.04$ ) and  $\text{pK}_{\text{a}} = 3.71$  ( $\sigma = 0.02$ ). The values of

correlation coefficient  $R$ ,  $pK_a$  obtained from Hill plot analysis, and the Hill slope values of  $\delta H5U$ ,  $\delta H6C$ ,  $\delta H5C$  are shown in the respective graphs.  $H6U$  of UpC did not show any significant change in  $\log((\Delta_T - \Delta)/\Delta)$  with pH, hence Hill plot for  $H6U$  was not done.

**Figure S2h:** The Hill plots for  $\delta H6U$ ,  $\delta H5U$ ,  $\delta H6C$ ,  $\delta H5C$  of UpC in the  $6.79 \leq pH \leq 11.42$ .  $\Delta_T$  for  $H6U$  ( $6.79 \leq pH \leq 11.42$ ) = 0.244 ppm. The plot of  $\log((\Delta_T - \Delta)/\Delta)$  vs. pH gave a straight line ( $R = 1.00$ ) with a slope = 1.16 ( $\sigma = 0.02$ ) and  $pK_a = 9.06$  ( $\sigma = 0.01$ ).  $\Delta_T$  for  $H5U$  ( $6.79 \leq pH \leq 11.42$ ) = 0.068 ppm. The plot of  $\log((\Delta_T - \Delta)/\Delta)$  vs. pH gave a straight line ( $R = 1.00$ ) with a slope = 1.16 ( $\sigma = 0.02$ ) and  $pK_a = 9.04$  ( $\sigma = 0.01$ ).  $\Delta_T$  for  $H6C$  ( $6.79 \leq pH \leq 11.42$ ) = 0.037 ppm. The plot of  $\log((\Delta_T - \Delta)/\Delta)$  vs. pH gave a straight line ( $R = 0.99$ ) with a slope = 1.16 ( $\sigma = 0.03$ ) and  $pK_a = 9.14$  ( $\sigma = 0.02$ ).  $\Delta_T$  for  $H5C$  ( $6.79 \leq pH \leq 11.42$ ) = 0.021 ppm. The plot of  $\log((\Delta_T - \Delta)/\Delta)$  vs. pH gave a straight line ( $R = 0.99$ ) with a slope = 1.17 ( $\sigma = 0.03$ ) and  $pK_a = 9.06$  ( $\sigma = 0.02$ ). The values of correlation coefficient  $R$ ,  $pK_a$  obtained from Hill plot analysis, and the Hill slope values of  $\delta H6U$ ,  $\delta H5U$ ,  $\delta H6C$  and  $\delta H5C$  are shown in the respective graphs.

**Figure S2i:** The Hill plots for  $\delta H8A$ ,  $\delta H2A$ ,  $\delta H6U$ ,  $\delta H5U$  of UpA in the  $1.11 \leq pH \leq 6.98$ .  $\Delta_T$  for  $H8A$  ( $1.11 \leq pH \leq 6.98$ ) = 0.188 ppm. The plot of  $\log((\Delta_T - \Delta)/\Delta)$  vs. pH gave a straight line ( $R = 1.00$ ) with a slope = 1.17 ( $\sigma = 0.02$ ) and  $pK_a = 3.07$  ( $\sigma = 0.01$ ).  $\Delta_T$  for  $H2A$  ( $1.11 \leq pH \leq 6.98$ ) = 0.219 ppm. The plot of  $\log((\Delta_T - \Delta)/\Delta)$  vs. pH gave a straight line ( $R = 1.00$ ) with a slope = 1.18 ( $\sigma = 0.03$ ) and  $pK_a = 3.06$  ( $\sigma = 0.01$ ).  $\Delta_T$  for  $H6U$  ( $1.11 \leq pH \leq 6.98$ ) = 0.094 ppm. The plot of  $\log((\Delta_T - \Delta)/\Delta)$  vs. pH gave a straight line ( $R = 1.00$ ) with a slope = 1.27 ( $\sigma = 0.02$ ) and  $pK_a = 3.12$  ( $\sigma = 0.01$ ).  $\Delta_T$  for  $H5U$  ( $1.11 \leq pH \leq 6.98$ ) = 0.052 ppm. The plot of  $\log((\Delta_T - \Delta)/\Delta)$  vs. pH gave a straight line ( $R = 1.00$ ) with a slope = 1.17 ( $\sigma = 0.03$ ) and  $pK_a = 3.01$  ( $\sigma = 0.01$ ). The values of correlation coefficient  $R$ ,  $pK_a$  obtained from Hill plot analysis, and the Hill slope values of  $\delta H8A$ ,  $\delta H2A$ ,  $\delta H6U$  and  $\delta H5U$  are shown in the respective graphs.

**Figure S2j:** The Hill plots for  $\delta H6U$ ,  $\delta H5U$  of UpA in the  $6.6 \leq pH \leq 11.1$ .  $\Delta_T$  for  $H6U$  ( $6.6 \leq pH \leq 11.1$ ) = 0.226 ppm. The plot of  $\log((\Delta_T - \Delta)/\Delta)$  vs. pH gave a straight line ( $R = 1.00$ ) with a slope = 1.07 ( $\sigma = 0.02$ ) and  $pK_a = 9.09$  ( $\sigma = 0.01$ ).  $\Delta_T$  for  $H5U$  ( $6.6 \leq pH$



$\leq 11.1$ ) = 0.117 ppm. The plot of  $\log((\Delta_T - \Delta)/\Delta)$  vs. pH gave a straight line ( $R = 1.00$ ) with a slope = 1.06 ( $\sigma = 0.02$ ) and  $pK_a = 9.09$  ( $\sigma = 0.01$ ). The values of correlation coefficient  $R$ ,  $pK_a$  obtained from Hill plot analysis, and the Hill slope values of  $\delta H6U$ , and  $\delta H5U$  are shown in the respective graphs. H8A and H2A of UpA did not show any significant change in  $\log((\Delta_T - \Delta)/\Delta)$  with pH, hence Hill plots for H8A and H2A were not done.

**Figure S2k:** The Hill plots for  $\delta H8A$ ,  $\delta H2A$ ,  $\delta H6U$ ,  $\delta H5U$  of ApU in the  $1.35 \leq pH \leq 6.99$ .  $\Delta_T$  for H8A ( $1.35 \leq pH \leq 6.99$ ) = 0.216 ppm. The plot of  $\log((\Delta_T - \Delta)/\Delta)$  vs. pH gave a straight line ( $R = 0.98$ ) with a slope = 0.97 ( $\sigma = 0.05$ ) and  $pK_a = 2.95$  ( $\sigma = 0.02$ ).  $\Delta_T$  for H2A ( $1.35 \leq pH \leq 6.99$ ) = 0.242 ppm. The plot of  $\log((\Delta_T - \Delta)/\Delta)$  vs. pH gave a straight line ( $R = 0.98$ ) with a slope = 0.96 ( $\sigma = 0.06$ ) and  $pK_a = 2.95$  ( $\sigma = 0.02$ ).  $\Delta_T$  for H6U ( $1.35 \leq pH \leq 6.99$ ) = 0.089 ppm. The plot of  $\log((\Delta_T - \Delta)/\Delta)$  vs. pH gave a straight line ( $R = 0.98$ ) with a slope = 0.92 ( $\sigma = 0.05$ ) and  $pK_a = 2.98$  ( $\sigma = 0.02$ ).  $\Delta_T$  for H5U ( $1.35 \leq pH \leq 6.99$ ) = 0.159 ppm. The plot of  $\log((\Delta_T - \Delta)/\Delta)$  vs. pH gave a straight line ( $R = 0.98$ ) with a slope = 0.96 ( $\sigma = 0.05$ ) and  $pK_a = 2.95$  ( $\sigma = 0.02$ ). The values of correlation coefficient  $R$ ,  $pK_a$  obtained from Hill plot analysis, and the Hill slope values of  $\delta H8A$ ,  $\delta H2A$ ,  $\delta H6U$  and  $\delta H5U$  are shown in the respective graphs.

**Figure S2l:** The Hill plots for  $\delta H8A$ ,  $\delta H2A$ ,  $\delta H6U$ ,  $\delta H5U$  of ApU in the  $6.99 \leq pH \leq 10.96$ .  $\Delta_T$  for H8A ( $6.99 \leq pH \leq 10.96$ ) = 0.021 ppm. The plot of  $\log((\Delta_T - \Delta)/\Delta)$  vs. pH gave a straight line ( $R = 0.99$ ) with a slope = 1.04 ( $\sigma = 0.03$ ) and  $pK_a = 9.35$  ( $\sigma = 0.02$ ).  $\Delta_T$  for H2A ( $6.99 \leq pH \leq 10.96$ ) = 0.007 ppm. The plot of  $\log((\Delta_T - \Delta)/\Delta)$  vs. pH gave a straight line ( $R = 0.99$ ) with a slope = 0.99 ( $\sigma = 0.05$ ) and  $pK_a = 9.33$  ( $\sigma = 0.02$ ).  $\Delta_T$  for H6U ( $6.99 \leq pH \leq 10.96$ ) = 0.126 ppm. The plot of  $\log((\Delta_T - \Delta)/\Delta)$  vs. pH gave a straight line ( $R = 0.99$ ) with a slope = 0.99 ( $\sigma = 0.03$ ) and  $pK_a = 9.36$  ( $\sigma = 0.02$ ).  $\Delta_T$  for H5U ( $6.99 \leq pH \leq 10.96$ ) = 0.017 ppm. The plot of  $\log((\Delta_T - \Delta)/\Delta)$  vs. pH gave a straight line ( $R = 0.99$ ) with a slope = 1.13 ( $\sigma = 0.04$ ) and  $pK_a = 9.42$  ( $\sigma = 0.02$ ). The values of correlation coefficient  $R$ ,  $pK_a$  obtained from Hill plot analysis, and the Hill slope values of  $\delta H8A$ ,  $\delta H2A$ ,  $\delta H6U$  and  $\delta H5U$  are shown in the respective graphs.

**Figure S2m:** The Hill plots for  $\delta\text{H8A}$ ,  $\delta\text{H2A}$ , of ApEt in the  $1.62 \leq \text{pH} \leq 6.38$ .  $\Delta_{\text{T}}$  for H8A ( $1.62 \leq \text{pH} \leq 6.38$ ) = 0.228 ppm. The plot of  $\log((\Delta_{\text{T}} - \Delta)/\Delta)$  vs. pH gave a straight line ( $R = 0.98$ ) with a slope = 0.97 ( $\sigma = 0.1$ ) and  $\text{pK}_{\text{a}} = 3.11$  ( $\sigma = 0.04$ ).  $\Delta_{\text{T}}$  for H2A ( $1.62 \leq \text{pH} \leq 6.38$ ) = 0.206 ppm. The plot of  $\log((\Delta_{\text{T}} - \Delta)/\Delta)$  vs. pH gave a straight line ( $R = 0.98$ ) with a slope = 0.98 ( $\sigma = 0.1$ ) and  $\text{pK}_{\text{a}} = 3.10$  ( $\sigma = 0.04$ ). The values of correlation coefficient  $R$ ,  $\text{pK}_{\text{a}}$  obtained from Hill plot analysis, and the Hill slope values of  $\delta\text{H8A}$  and  $\delta\text{H2A}$  are shown in the respective graphs.

**Figure S2n:** The Hill plots for  $\delta\text{H8G}$  of GpEt in the  $6.98 \leq \text{pH} \leq 11.00$ .  $\Delta_{\text{T}}$  for H8G ( $6.98 \leq \text{pH} \leq 11.00$ ) = 0.149 ppm. The plot of  $\log((\Delta_{\text{T}} - \Delta)/\Delta)$  vs. pH gave a straight line ( $R = 0.99$ ) with a slope = 0.95 ( $\sigma = 0.05$ ) and  $\text{pK}_{\text{a}} = 9.25$  ( $\sigma = 0.02$ ). The value of correlation coefficient  $R$ ,  $\text{pK}_{\text{a}}$  obtained from Hill plot analysis, and the Hill slope values of  $\delta\text{H8G}$  is shown in the respective graph.

**Figure 2o:** The Hill plots for  $\delta\text{H6U}$ ,  $\delta\text{H5U}$ , of UpEt in the  $6.65 \leq \text{pH} \leq 11.44$ .  $\Delta_{\text{T}}$  for H6U ( $6.65 \leq \text{pH} \leq 11.44$ ) = 0.198 ppm. The plot of  $\log((\Delta_{\text{T}} - \Delta)/\Delta)$  vs. pH gave a straight line ( $R = 0.99$ ) with a slope = 1.03 ( $\sigma = 0.05$ ) and  $\text{pK}_{\text{a}} = 9.44$  ( $\sigma = 0.02$ ).  $\Delta_{\text{T}}$  for H5U ( $6.65 \leq \text{pH} \leq 11.44$ ) = 0.091 ppm. The plot of  $\log((\Delta_{\text{T}} - \Delta)/\Delta)$  vs. pH gave a straight line ( $R = 0.99$ ) with a slope = 1.04 ( $\sigma = 0.04$ ) and  $\text{pK}_{\text{a}} = 9.43$  ( $\sigma = 0.02$ ). The values of correlation coefficient  $R$ ,  $\text{pK}_{\text{a}}$  obtained from Hill plot analysis, and the Hill slope values of  $\delta\text{H6U}$  and  $\delta\text{H5U}$  are shown in the respective graphs.

**Figure S2p:** The Hill plots for  $\delta\text{H6C}$ ,  $\delta\text{H5C}$ , of CpEt in the  $1.66 \leq \text{pH} \leq 6.39$ .  $\Delta_{\text{T}}$  for H6C ( $6.65 \leq \text{pH} \leq 11.44$ ) = 0.321 ppm. The plot of  $\log((\Delta_{\text{T}} - \Delta)/\Delta)$  vs. pH gave a straight line ( $R = 1.00$ ) with a slope = 1.01 ( $\sigma = 0.04$ ) and  $\text{pK}_{\text{a}} = 3.83$  ( $\sigma = 0.02$ ).  $\Delta_{\text{T}}$  for H5C ( $1.66 \leq \text{pH} \leq 6.39$ ) = 0.190 ppm. The plot of  $\log((\Delta_{\text{T}} - \Delta)/\Delta)$  vs. pH gave a straight line ( $R = 1.00$ ) with a slope = 1.02 ( $\sigma = 0.04$ ) and  $\text{pK}_{\text{a}} = 3.82$  ( $\sigma = 0.02$ ). The values of correlation coefficient  $R$ ,  $\text{pK}_{\text{a}}$  obtained from Hill plot analysis, and the Hill slope values of  $\delta\text{H6C}$  and  $\delta\text{H5C}$  are shown in the respective graphs.

**Legends for Figure S3:**

**Figure S3a:** pH dependant fraction protonation ( $f_p$ ) of aromatic protons (H8A, H2A, H8G) of ApG within the pH values of  $0.3 \leq \text{pH} \leq 7.56$ .  $\delta_{\text{neutral}}$  (8.261 ppm) of H8A is subtracted from  $\delta_{\text{obs}}$  at each pH values of H8A and divided by the total change  $\Delta\delta$  (0.297 ppm) in going from neutral to protonated state to get the value of  $f_p$ .  $\delta_{\text{neutral}}$  (8.153 ppm) of H2A is subtracted from  $\delta_{\text{obs}}$  at each pH values of H2A and divided by the total change  $\Delta\delta$  (0.322) in going from neutral to protonated state to get the value of  $f_p$ .  $\delta_{\text{neutral}}$  (7.933 ppm) of H8G is subtracted from  $\delta_{\text{obs}}$  at each pH values of H8G and divided by the total change  $\Delta\delta$  (1.124) in going from neutral to protonated state to get the value of  $f_p$ .  $\text{pK}_a$  values obtained from Hill plot of H8A, H2A and H8G are shown in the respective graphs.

**Figure S3b:** pH dependant fraction deprotonation ( $f_D$ ) of aromatic protons (H8A, H2A, H8G) of ApG within the pH values of  $7.56 \leq \text{pH} \leq 11.63$ .  $\delta_{\text{neutral}}$  (8.261 ppm) of H8A is subtracted from  $\delta_{\text{obs}}$  at each pH values of H8A and divided by the total change  $\Delta\delta$  (0.009 ppm) in going from neutral to deprotonated state to get the value of  $f_D$ .  $\delta_{\text{neutral}}$  (8.153 ppm) of H2A is subtracted from  $\delta_{\text{obs}}$  at each pH values of H2A and divided by the total change  $\Delta\delta$  (0.032 ppm) in going from neutral to deprotonated state to get the value of  $f_D$ .  $\delta_{\text{neutral}}$  (7.933 ppm) of H8G is subtracted from  $\delta_{\text{obs}}$  at each pH values of H8G and divided by the total change  $\Delta\delta$  (0.068 ppm) in going from neutral to deprotonated state to get the value of  $f_D$ .  $\text{pK}_a$  values obtained from Hill plot of H8A, H2A and H8G are shown in the respective graphs.

**Figure S3c:** pH dependant fraction protonation ( $f_p$ ) of aromatic protons (H8A, H2A, H8G) of GpA within the pH values of  $0.12 \leq \text{pH} \leq 7.29$ .  $\delta_{\text{neutral}}$  (8.344 ppm) of H8A is subtracted from  $\delta_{\text{obs}}$  at each pH values of H8A and divided by the total change  $\Delta\delta$  (0.205 ppm) in going from neutral to protonated state to get the value of  $f_p$ .  $\delta_{\text{neutral}}$  (8.206 ppm) of H2A is subtracted from  $\delta_{\text{obs}}$  at each pH values of H2A and divided by the total change  $\Delta\delta$  (0.301 ppm) in going from neutral to protonated state to get the value of  $f_p$ .  $\delta_{\text{neutral}}$  (7.904 ppm) of H8G is subtracted from  $\delta_{\text{obs}}$  at each pH values of H8G and divided by the total change  $\Delta\delta$  (1.184 ppm) in going from neutral to protonated state to get the value of

$f_p$ .  $pK_a$  values obtained from Hill plot of H8A, H2A and H8G are shown in the respective graphs.

**Figure S3d:** pH dependant fraction deprotonation ( $f_D$ ) of aromatic protons (H8A, H8G) of GpA within the pH values of  $6.93 \leq \text{pH} \leq 10.70$ .  $\delta_{\text{neutral}}$  (8.345 ppm) of H8A is subtracted from  $\delta_{\text{obs}}$  at each pH values of H8A and divided by the total change  $\Delta\delta$  (0.056 ppm) in going from neutral to deprotonated state to get the value of  $f_D$ .  $\delta_{\text{neutral}}$  (7.906 ppm) of H8G is subtracted from  $\delta_{\text{obs}}$  at each pH values of H8G and divided by the total change  $\Delta\delta$  (0.141 ppm) in going from neutral to deprotonated state to get the value of  $f_D$ .  $pK_a$  values obtained from Hill plot of H8A and H8G are shown in the respective graphs. H2A of GpA did not show any significant change in fraction deprotonation ( $f_D$ ) with pH, hence pH dependant fraction deprotonation ( $f_D$ ) of aromatic proton H2A was not done.

**Figure S3e:** pH dependant fraction protonation ( $f_p$ ) of aromatic protons (H6U, H5U, H6C, H5C) of CpU within the pH values of  $1.87 \leq \text{pH} \leq 6.92$ .  $\delta_{\text{neutral}}$  ( $\delta$  7.930) of H6U is subtracted from  $\delta_{\text{obs}}$  at each pH values of H6U and divided by the total change  $\Delta\delta$  (0.013 ppm) in going from neutral to protonated state to get the value of  $f_p$ .  $\delta_{\text{neutral}}$  (5.816 ppm) of H5U is subtracted from  $\delta_{\text{obs}}$  at each pH values of H5U and divided by the total change  $\Delta\delta$  (0.073 ppm) in going from neutral to protonated state to get the value of  $f_p$ .  $\delta_{\text{neutral}}$  (7.902 ppm) of H6C is subtracted from  $\delta_{\text{obs}}$  at each pH values of H6C and divided by the total change  $\Delta\delta$  (0.289 ppm) in going from neutral to protonated state to get the value of  $f_p$ .  $\delta_{\text{neutral}}$  (5.969 ppm) of H5C is subtracted from  $\delta_{\text{obs}}$  at each pH values of H5C and divided by the total change  $\Delta\delta$  (0.262 ppm) in going from neutral to protonated state to get the value of  $f_p$ .  $pK_a$  values obtained from Hill plot of H6U, H5U, H6C and H5C are shown in the respective graphs.

**Figure S3f:** pH dependant fraction deprotonation ( $f_D$ ) of aromatic protons (H6U, H5U, H6C, H5C) of CpU within the pH values of  $6.92 \leq \text{pH} \leq 11.32$ .  $\delta_{\text{neutral}}$  (7.930 ppm) of H6U is subtracted from  $\delta_{\text{obs}}$  at each pH values of H6U and divided by the total change  $\Delta\delta$  (0.162 ppm) in going from neutral to deprotonated state to get the value of  $f_D$ .  $\delta_{\text{neutral}}$  (5.816 ppm) of H5U is subtracted from  $\delta_{\text{obs}}$  at each pH values of H5U and divided by the

total change  $\Delta\delta$  (0.059 ppm) in going from neutral to deprotonated state to get the value of  $f_D$ .  $\delta_{\text{neutral}}$  (7.902 ppm) of H6C is subtracted from  $\delta_{\text{obs}}$  at each pH values of H6C and divided by the total change  $\Delta\delta$  (0.078 ppm) in going from neutral to deprotonated state to get the value of  $f_D$ .  $\delta_{\text{neutral}}$  (5.969 ppm) of H5C is subtracted from  $\delta_{\text{obs}}$  at each pH values of H5C and divided by the total change  $\Delta\delta$  (0.053 ppm) in going from neutral to deprotonated state to get the value of fraction deprotonation  $f_D$ .  $pK_a$  values obtained from Hill plot of H6U, H5U, H6C and H5C are shown in the respective graphs.

**Figure S3g:** pH dependant fraction protonation ( $f_P$ ) of aromatic protons (H5U, H6C, H5C) of UpC within the pH values of  $1.97 \leq \text{pH} \leq 6.79$ .  $\delta_{\text{neutral}}$  (5.858 ppm) of H5U is subtracted from  $\delta_{\text{obs}}$  at each pH values of H5U and divided by the total change  $\Delta\delta$  (0.033 ppm) in going from neutral to protonated state to get the value of  $f_P$ .  $\delta_{\text{neutral}}$  (7.936 ppm) of H6C is subtracted from  $\delta_{\text{obs}}$  at each pH values of H6C and divided by the total change  $\Delta\delta$  (0.242 ppm) in going from neutral to protonated state to get the value of  $f_P$ .  $\delta_{\text{neutral}}$  (6.026 ppm) of H5C is subtracted from  $\delta_{\text{obs}}$  at each pH values of H5C and divided by the total change  $\Delta\delta$  (0.247 ppm) in going from neutral to protonated state to get the value of  $f_P$ .  $pK_a$  values obtained from Hill plot of H5U, H6C and H5C are shown in the respective graphs. H6U of UpA did not show any significant change in fraction protonation ( $f_P$ ) with pH, hence pH dependant fraction protonation ( $f_P$ ) of aromatic proton H2A was not done.

**Figure S3h:** pH dependant fraction deprotonation ( $f_D$ ) of aromatic protons (H6U, H5U, H6C, H5C) of UpC within the pH values of  $6.79 \leq \text{pH} \leq 11.42$ .  $\delta_{\text{neutral}}$  (7.918 ppm) of H6U is subtracted from  $\delta_{\text{obs}}$  at each pH values of H6U and divided by the total change  $\Delta\delta$  (0.244 ppm) in going from neutral to deprotonated state to get the value of  $f_D$ .  $\delta_{\text{neutral}}$  (5.858 ppm) of H5U is subtracted from  $\delta_{\text{obs}}$  at each pH values of H5U and divided by the total change  $\Delta\delta$  (0.068 ppm) in going from neutral to deprotonated state to get the value of  $f_D$ .  $\delta_{\text{neutral}}$  (7.936 ppm) of H6C is subtracted from  $\delta_{\text{obs}}$  at each pH values of H6C and divided by the total change  $\Delta\delta$  (0.037 ppm) in going from neutral to deprotonated state to get the value of  $f_D$ .  $\delta_{\text{neutral}}$  (6.026 ppm) of H5C is subtracted from  $\delta_{\text{obs}}$  at each pH values of H5C and divided by the total change  $\Delta\delta$  (0.021 ppm) in going from neutral to

deprotonated state to get the value of  $f_D$ .  $pK_a$  values obtained from Hill plot of H6U, H5U, H6C and H5C are shown in the respective graphs.

**Figure S3i:** pH dependant fraction protonation of aromatic protons (H8A, H2A, H6U, H5U) of UpA within the pH values of  $1.11 \leq \text{pH} \leq 6.60$ .  $\delta_{\text{neutral}}$  (8.435 ppm) of H8A is subtracted from  $\delta_{\text{obs}}$  at each pH values of H8A and divided by the total change  $\Delta\delta$  (0.188 ppm) in going from neutral to protonated state to get the value of  $f_p$ .  $\delta_{\text{neutral}}$  (8.256 ppm) of H2A is subtracted from  $\delta_{\text{obs}}$  at each pH values of H5U and divided by the total change  $\Delta\delta$  (0.219 ppm) in going from neutral to protonated state to get the value of  $f_p$ .  $\delta_{\text{neutral}}$  (7.748 ppm) of H6U is subtracted from  $\delta_{\text{obs}}$  at each pH values of H6U and divided by the total change  $\Delta\delta$  (0.094 ppm) in going from neutral to protonated state to get the value of  $f_p$ .  $\delta_{\text{neutral}}$  (5.785 ppm) of H5U is subtracted from  $\delta_{\text{obs}}$  at each pH values of H5U and divided by the total change  $\Delta\delta$  (0.052 ppm) in going from neutral to protonated state to get the value of  $f_p$ .  $pK_a$  values obtained from Hill plot of H8A, H2A H6U and H5U are shown in the respective graphs.

**Figure S3j:** pH dependant fraction deprotonation ( $f_D$ ) of aromatic protons (H6U, H5U) of UpA within the pH values of  $6.60 \leq \text{pH} \leq 11.10$ .  $\delta_{\text{neutral}}$  (7.918 ppm) of H6U is subtracted from  $\delta_{\text{obs}}$  at each pH values of H6U and divided by the total change  $\Delta\delta$  (0.226 ppm) in going from neutral to deprotonated state to get the value of  $f_D$ .  $\delta_{\text{neutral}}$  (5.731 ppm) of H5U is subtracted from  $\delta_{\text{obs}}$  at each pH values of H5U and divided by the total change  $\Delta\delta$  (0.117 ppm) in going from neutral to deprotonated state to get the value of  $f_D$ .  $pK_a$  values obtained from Hill plot of H6U and H5U are shown in the respective graphs. H8A and H2A of UpA did not show any significant change in fraction deprotonation ( $f_D$ ) with pH, hence pH dependant fraction deprotonation ( $f_D$ ) of aromatic protons H8A and H2A were not done.

**Figure S3k:** pH dependant fraction protonation ( $f_p$ ) of aromatic protons (H8A, H2A, H6U, H5U) of ApU within the pH values of  $1.35 \leq \text{pH} \leq 6.99$ .  $\delta_{\text{neutral}}$  (8.362 ppm) of H8A is subtracted from  $\delta_{\text{obs}}$  at each pH values of H8A and divided by the total change  $\Delta\delta$  (0.216 ppm) in going from neutral to protonated state to get the value of  $f_p$ .  $\delta_{\text{neutral}}$

(8.222 ppm) of H2A is subtracted from  $\delta_{\text{obs}}$  at each pH values of H2A and divided by the total change  $\Delta\delta$  (0.242 ppm) in going from neutral to protonated state to get the value of  $f_p$ .  $\delta_{\text{neutral}}$  (7.767 ppm) of H6U is subtracted from  $\delta_{\text{obs}}$  at each pH values of H6U and divided by the total change  $\Delta\delta$  (0.089 ppm) in going from neutral to protonated state to get the value of  $f_p$ .  $\delta_{\text{neutral}}$  (5.639 ppm) of H5U is subtracted from  $\delta_{\text{obs}}$  at each pH values of H5U and divided by the total change  $\Delta\delta$  (0.159 ppm) in going from neutral to protonated state to get the value of  $f_p$ .  $pK_a$  values obtained from Hill plot of H8A, H2A, H6U and H5U are shown in the respective graphs.

**Figure S3l:** pH dependant fraction deprotonation ( $f_D$ ) of aromatic protons (H8A, H2A, H6U, H5U) of ApU within the pH values of  $6.99 \leq \text{pH} \leq 10.96$ .  $\delta_{\text{neutral}}$  (8.362 ppm) of H8A is subtracted from  $\delta_{\text{obs}}$  at each pH values of H8A and divided by the total change  $\Delta\delta$  (0.021 ppm) in going from neutral to deprotonated state to get the value of  $f_D$ .  $\delta_{\text{neutral}}$  (8.222 ppm) of H2A is subtracted from  $\delta_{\text{obs}}$  at each pH values of H2A and divided by the total change  $\Delta\delta$  (0.007 ppm) in going from neutral to deprotonated state to get the value of  $f_D$ .  $\delta_{\text{neutral}}$  (7.767 ppm) of H6U is subtracted from  $\delta_{\text{obs}}$  at each pH values of H6U and divided by the total change  $\Delta\delta$  (0.126 ppm) in going from neutral to deprotonated state to get the value of  $f_D$ .  $\delta_{\text{neutral}}$  (5.638 ppm) of H5U is subtracted from  $\delta_{\text{obs}}$  at each pH values of H5U and divided by the total change  $\Delta\delta$  (0.017 ppm) in going from neutral to deprotonated state to get the value of  $f_D$ .  $pK_a$  values obtained from Hill plot of H8A, H2A, H6U and H5U are shown in the respective graphs.

**Figure S3m:** pH dependant fraction protonation ( $f_p$ ) of aromatic protons (H8A, H2A) of ApEt within the pH values of  $1.62 \leq \text{pH} \leq 6.38$ .  $\delta_{\text{neutral}}$  (8.354 ppm) of H8A is subtracted from  $\delta_{\text{obs}}$  at each pH values of H8A and divided by the total change  $\Delta\delta$  (0.228 ppm) in going from neutral to protonated state to get the value of  $f_p$ .  $\delta_{\text{neutral}}$  (8.270 ppm) of H2A is subtracted from  $\delta_{\text{obs}}$  at each pH values of H2A and divided by the total change  $\Delta\delta$  (0.206 ppm) in going from neutral to protonated state to get the value of  $f_p$ .  $pK_a$  values obtained from Hill plot of H8A and H2A are shown in the respective graphs.

**Figure S3n:** pH dependant fraction deprotonation ( $f_D$ ) of aromatic proton (H8G) of GpEt within the pH values of  $6.89 \leq \text{pH} \leq 11.00$ .  $\delta_{\text{neutral}}$  (8.010 ppm) of H8G is subtracted from  $\delta_{\text{obs}}$  at each pH values of H8G and divided by the total change  $\Delta\delta$  (0.149 ppm) in going from neutral to deprotonated state to get the value of  $f_D$ .  $\text{pK}_a$  value obtained from Hill plot of H8G is shown in the respective graph.

**Figure S3o:** pH dependant fraction deprotonation ( $f_D$ ) of aromatic protons (H6U, H5U) of UpEt within the pH values of  $6.65 \leq \text{pH} \leq 11.44$ .  $\delta_{\text{neutral}}$  (7.884 ppm) of H6U is subtracted from  $\delta_{\text{obs}}$  at each pH values of H6U and divided by the total change  $\Delta\delta$  (0.198 ppm) in going from neutral to deprotonated state to get the value of  $f_D$ .  $\delta_{\text{neutral}}$  (5.918 ppm) of H5U is subtracted from  $\delta_{\text{obs}}$  at each pH values of H5U and divided by the total change  $\Delta\delta$  (0.091 ppm) in going from neutral to deprotonated state to get the value of  $f_D$ .  $\text{pK}_a$  values obtained from Hill plot of H6U and H5U are shown in the respective graphs.

**Figure S3p:** pH dependant fraction protonation ( $f_P$ ) of aromatic protons (H6C, H5C) of CpEt within the pH values of  $1.66 \leq \text{pH} \leq 6.39$ .  $\delta_{\text{neutral}}$  (7.848 ppm) of H6U is subtracted from  $\delta_{\text{obs}}$  at each pH values of H6U and divided by the total change  $\Delta\delta$  (0.321 ppm) in going from neutral to protonated state to get the value of  $f_P$ .  $\delta_{\text{neutral}}$  (6.069 ppm) of H5C is subtracted from  $\delta_{\text{obs}}$  at each pH values of H5C and divided by the total change  $\Delta\delta$  (0.190 ppm) in going from neutral to protonated state to get the value of  $f_P$ .  $\text{pK}_a$  values obtained from Hill plot of H6C and H5C are shown in the respective graphs.

#### Legends for Figure S4:

Panels (A1) – (E2) show the chemical shift change over the pH-range,  $\Delta\delta$  [ $\delta_N - \delta_{P/D}$ , in ppm; N, P, D stands for neutral, protonated and deprotonated state], as a basis for atom- $\pi\sigma$  interaction<sup>12,16</sup> between nearest neighbor nucleobases in **1** – **6**.  $\Delta\delta$  corresponds to the relative shielding (upfield shift,  $\Delta\delta > 0$ ) or deshielding (downfield shift,  $\Delta\delta < 0$ ) as a function of pH (see Figure S1).  $\Delta\delta$  of nucleotide-3'-ethylphosphate and nucleoside have



been used for mimicking 3'-nucleotidyl unit (Np) and 5'-nucleotidyl unit (pN') for corresponding dinucleotide monophosphate (NpN').

The electrostatic interaction between the partial charge distribution of a nucleobase (depending upon its pseudoaromatic character) and the  $\pi$ -electron density corresponding to the next base constitutes charge transfer through atom- $\pi\sigma$  interaction<sup>12,16,43</sup>. The protonation/deprotonation at nucleobase changes the conformational characteristics of pentose moieties as well as the partial charge distribution of aglycone (particularly for heteroatoms), in ground state, which in turn, causes a differential electrostatic interaction between neighboring nucleobases.

Panel (A1) shows the pH-dependent  $\Delta\delta$  of following aromatic protons of ApG in alkaline range (pH ~7.0 – 11.0; ApG<sup>-</sup>): H8A and H2A of ApG [(H8A)pG<sup>-</sup>: -0.009ppm and (H2A)pG<sup>-</sup>: -0.032ppm] and ApEt [no change of (H8A)pEt and (H2A)pEt, as adenosine does not have any deprotonation site]; H8G of ApG [Ap(H8G<sup>-</sup>): 0.068ppm] and G [H8G: 0.138ppm]. Panel (A2) shows the pH-dependent  $\Delta\delta$  of following aromatic protons of GpA in alkaline range (pH ~7.0 – 11.0; G<sup>-</sup>pA): H8G of GpA [(H8G<sup>-</sup>)pA: 0.141ppm] and GpEt [(H8G<sup>-</sup>)pEt: 0.149ppm]; H8A and H2A of GpA [G<sup>-</sup>p(H8A): -0.056ppm and G<sup>-</sup>p(H2A): -0.004ppm] and A [no change of H8A and H2A as adenosine does not have any deprotonation site].

Panel (B1) shows the pH-dependent  $\Delta\delta$  of following aromatic protons of ApU in acidic range (pH ~2.0 – 7.0; A<sup>H+</sup>pU): H8A and H2A of ApU [(H8A)<sup>H+</sup>pA: -0.216ppm and (H2A)<sup>H+</sup>pA: -0.242ppm] and ApEt [(H8A)<sup>H+</sup>pEt: -0.321ppm and (H2A)<sup>H+</sup>pEt: -0.19ppm]; H6U and H5U of ApU [A<sup>H+</sup>p(H6U): -0.089ppm, A<sup>H+</sup>p(H5U): -0.159ppm] and U [no change of H6U and H5U as uridine does not have any protonation site]. Panel (B2) shows the pH-dependent  $\Delta\delta$  of following aromatic protons of ApU in alkaline range (pH ~7.0 – 11.0; CpU<sup>-</sup>): H8A and H2A of ApU [(H8A)pU<sup>-</sup>: 0.021ppm and (H2A)pU<sup>-</sup>: -0.007ppm] and ApEt [no change of (H8A)pEt and (H2A)pEt, as adenosine does not have any deprotonation site,]; H6U and H5U of ApU [Ap(H6U<sup>-</sup>): 0.126ppm, Ap(H5U<sup>-</sup>): 0.017ppm] and U [H6U: 0.176ppm and H5U: 0.084ppm].

Panel (C1) shows the pH-dependent  $\Delta\delta$  of following aromatic protons of UpA in acidic range (pH ~1.0 – 7.0; UpA<sup>H+</sup>): H6U and H5U of UpA [(H6U)pA<sup>H+</sup>: -0.094ppm, (H5U)pA<sup>H+</sup>: -0.052ppm] and UpEt [no change of (H6U)pEt and (H5U)pEt as uridine

does not have any protonation site]; H8A and H2A of UpA [Up(**H8A**)<sup>H+</sup>: -0.188ppm and Up(**H2A**)<sup>H+</sup>: -0.219ppm] and A [**H8A**<sup>H+</sup>: -0.216ppm and **H2A**<sup>H+</sup>: -0.198ppm]. Panel (C2) shows the pH-dependent  $\Delta\delta$  of following aromatic protons of UpA in alkaline range (pH ~7.0 – 11.0; U<sup>-</sup>pA): H6U and H5U of UpA [(**H6U**)<sup>-</sup>pA: 0.226ppm, (**H5U**)<sup>-</sup>pA: -0.117ppm] and UpEt [(**H6U**)<sup>-</sup>pEt: 0.198ppm and (**H5U**)<sup>-</sup>pEt: 0.091ppm]; H8A and H2A of UpA [almost no change, U<sup>-</sup>p(**H8A**): -0.003ppm and U<sup>-</sup>p(**H2A**): -0.002ppm] and A [no change of **H8A** and **H2A** as adenosine does not have any deprotonation site].

Panel (D1) shows the pH-dependent  $\Delta\delta$  of following aromatic protons of UpC in acidic range (pH ~2.0 – 7.0; UpC<sup>H+</sup>): H6U and H5U of UpC [(**H6U**)pC<sup>H+</sup>: 0.002ppm, (**H5U**)pC<sup>H+</sup>: -0.033ppm] and UpEt [no change of (**H6U**)pEt and (**H5U**)pEt as uridine does not have any protonation site]; H6C and H5C of UpC [Up(**H6C**)<sup>H+</sup>: -0.242ppm and Up(**H5C**)<sup>H+</sup>: -0.247ppm] and C [**H6C**<sup>H+</sup>: -0.309ppm and **H5C**<sup>H+</sup>: -0.19ppm]. Panel (D2) shows the pH-dependent  $\Delta\delta$  of following aromatic protons of UpC in alkaline range (pH ~7.0 – 11.0; U<sup>-</sup>pC): H6U and H5U of UpC [(**H6U**)<sup>-</sup>pC: 0.068ppm, (**H5U**)<sup>-</sup>pC: 0.033ppm] and UpEt [(**H6U**)<sup>-</sup>pEt: 0.198ppm and (**H5U**)<sup>-</sup>pEt: 0.091ppm]; H6C and H5C of UpC [U<sup>-</sup>p(**H6C**): 0.037ppm and U<sup>-</sup>p(**H6C**): -0.021ppm] and C [no change of **H6C** and **H5C** as cytidine does not have any deprotonation site].

Panel (E1) shows the pH-dependent  $\Delta\delta$  of following aromatic protons of CpU in acidic range (pH ~2.0 – 7.0; C<sup>H+</sup>pU): H6C and H5C of CpU [(**H6C**)<sup>H+</sup>pU: -0.289ppm and (**H5C**)<sup>H+</sup>pU: -0.262ppm] and CpEt [(**H6C**)<sup>H+</sup>pEt: -0.321ppm and [(**H5C**)<sup>H+</sup>pEt: -0.19ppm]; H6U and H5U of CpU [C<sup>H+</sup>p(**H6U**): 0.013ppm, C<sup>H+</sup>p(**H5U**): -0.073ppm] and U [no change of **H6U** and **H5U** as uridine does not have any protonation site]. Panel (E2) shows the pH-dependent  $\Delta\delta$  of following aromatic protons of CpU in alkaline range (pH ~7.0 – 11.0; CpU<sup>-</sup>): H6C and H5C of CpU [(**H6C**)pU<sup>-</sup>: 0.078ppm and (**H5C**)pU<sup>-</sup>: 0.053ppm] and CpEt [no change of (**H6C**)pEt and (**H6C**)pEt, as cytidine does not have any deprotonation site]; H6U and H5U of CpU [Cp(**H6U**)<sup>-</sup>: 0.013ppm, Cp(**H5U**)<sup>-</sup>: 0.073ppm] and U [**H6U**: 0.176ppm and **H5U**: 0.084ppm].

<sup>1</sup>H NMR (at 500MHz with  $\delta_{\text{DSS}} = 0.015$  ppm as internal standard) for nucleoside adenosine (A), Guanosine (G), Uridine (U) and Cytidine (C) [with sample concentration of 1 mM] have been studied at acidic (pH = 1.9), neutral (pH = 6.6) and alkaline (pH = 10.3) state to compare with the 5'-nucleotidyl moieties of dimer, **1** – **6**. The pH-dependent chemical

shifts ( $\delta$ , in ppm) of aromatic protons are as follows:  $\delta_{\text{H8A}} = 8.555$  (at pH = 1.9) and 8.339 (at pH = 6.6);  $\delta_{\text{H2A}} = 8.458$  (at pH = 1.9) and 8.260 (at pH = 6.6) for **A**.  $\delta_{\text{H8G}} = 8.591$  (at pH = 1.9), 8.002 (at pH = 6.6) and 7.864 (at pH = 10.3) for **G**.  $\delta_{\text{H5U}} = 5.901$  (at pH = 6.6) and 5.817 (at pH = 10.3);  $\delta_{\text{H6U}} = 7.871$  (at pH = 6.6) and 7.695 (at pH = 10.3) for **U**.  $\delta_{\text{H5C}} = 6.054$  (at pH = 1.9) and 6.244 (at pH = 6.6);  $\delta_{\text{H6C}} = 7.84$  (at pH = 1.9) and 8.149 (at pH = 6.6) for **C**.

### Legends for Figure S5:

Panels (**A**) – (**F**) show the dimerisation shift<sup>31-33</sup> ( $\delta_{\text{NpEt}} - \delta_{\text{NpN'}}$ , in ppm) of the aromatic protons of 3' nucleotidyl unit of **1** – **6** at neutral (pH = 6.6), acidic (pH = 1.9) and alkaline (pH = 10.4) state. Due to base-base stacking interaction in dinucleoside monophosphates, **1** – **6**, the aromatic protons are shifted upfield compared to their monomeric counterparts, **7** – **10**. [except for  $\delta_{\text{H8A}}$  of ApU at neutral pH,  $\delta_{\text{H5U}}$  of UpA in alkaline pH and  $\delta_{\text{H6U}}$  of UpC as well as  $\delta_{\text{H6C}}$  of CpU at both neutral and acidic pH - where different partial charges between the nearest neighbor nucleobases cause these aromatic proton to get deshielded on dimerisation.]

Panel (**A**) shows dimerisation shift for H8A and H2A of ApG compared to H8A and H2A of ApEt at neutral (pH = 6.6), acidic (pH = 1.9) and alkaline (pH = 10.4) state. Panel (**B**) shows dimerisation shift for H8G of GpA compared to H8G of GpEt at neutral (pH = 6.6), acidic (pH = 1.9) and alkaline (pH = 10.4) state. Panel (**C**) shows dimerisation shift for H8A and H2A of ApU compared to H8A and H2A of ApEt at neutral (pH = 6.6), acidic (pH = 1.9) and alkaline (pH = 10.4) state. Panel (**D**) shows dimerisation shift for H5U and H6U of UpA compared to H5U and H6U of UpEt at neutral (pH = 6.6), acidic (pH = 1.9) and alkaline (pH = 10.4) state. Panel (**E**) shows dimerisation shift for H5U and H6U of UpC compared to H5U and H6U of UpEt at neutral (pH = 6.6), acidic (pH = 1.9) and alkaline (pH = 10.4) state. Panel (**F**) shows dimerisation shift for H5C and H6C of CpU compared to H5C and H6C of CpEt at neutral (pH = 6.6), acidic (pH = 1.9) and alkaline (pH = 10.4) state. See Table S3 for details.

## Figures S1a - S1p

Figure S1a : ApG

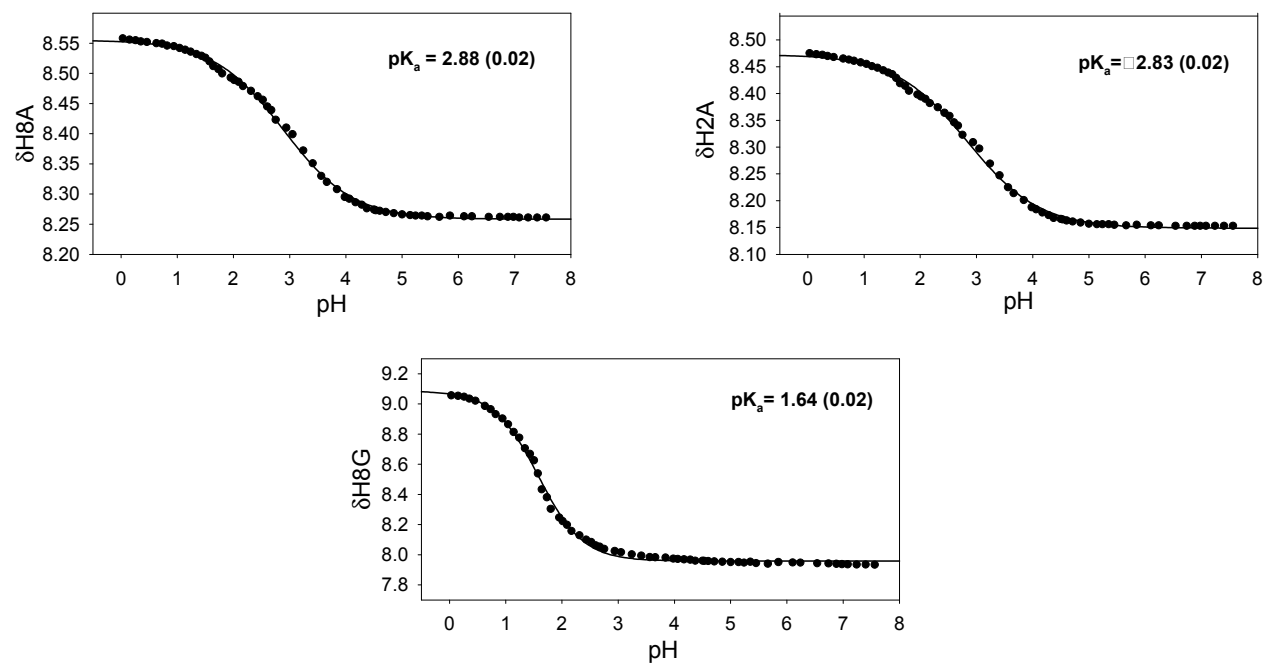

Figure S1b : ApG

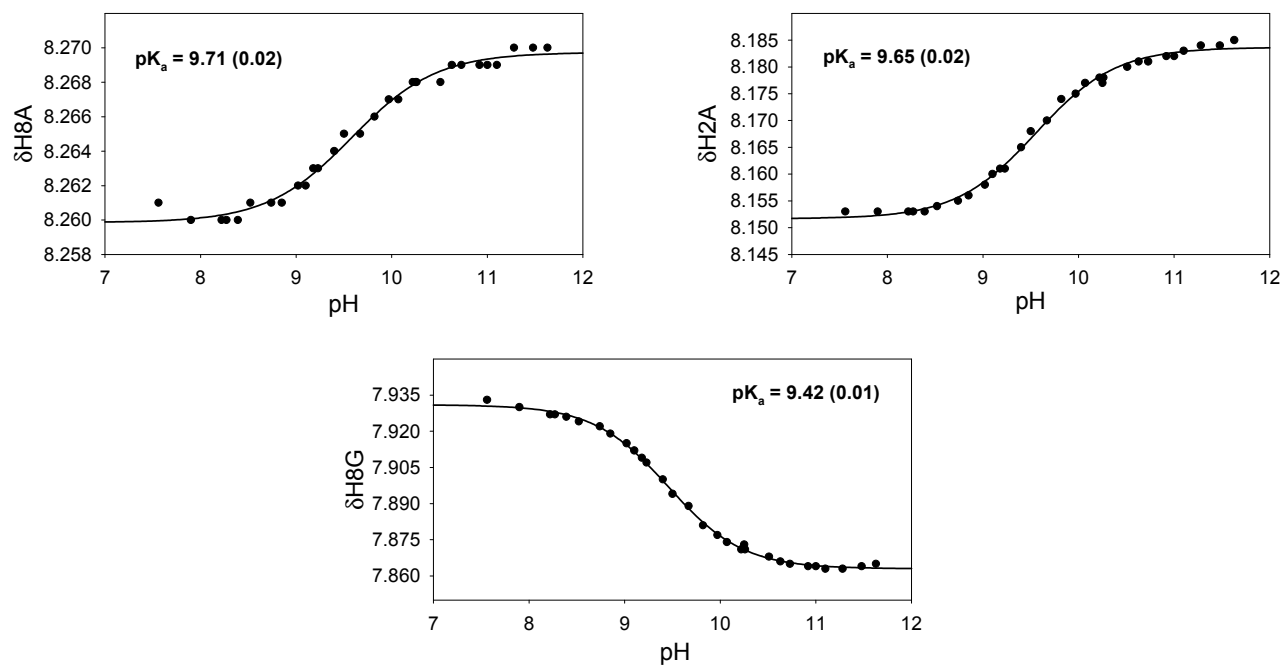

## Figures S1a - S1p

Figure S1c : GpA

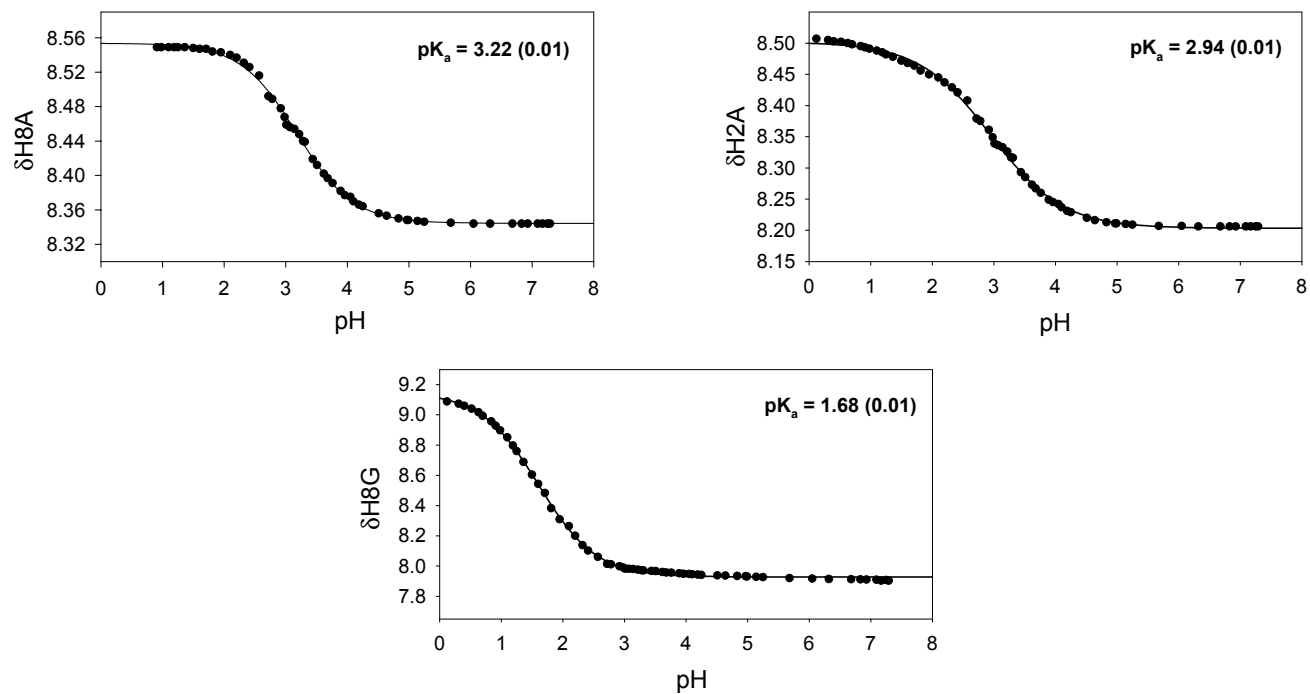

Figure S1d : GpA

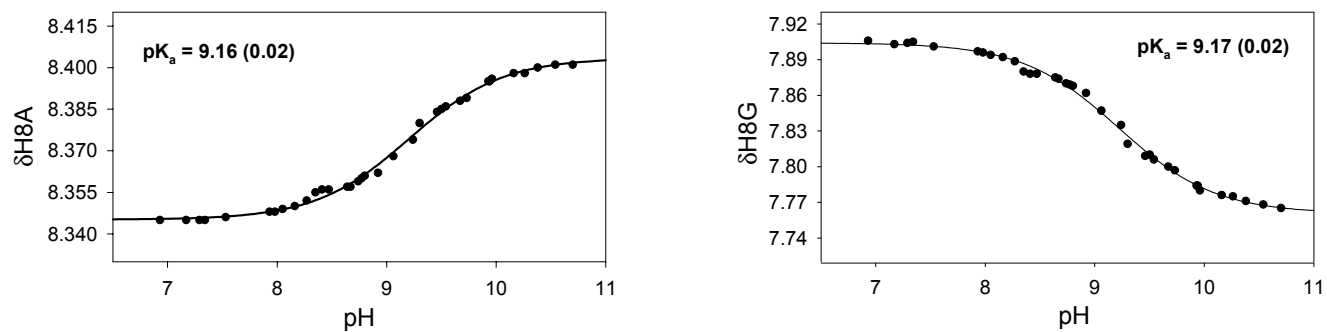

## Figures S1a - S1p

Figure S1e : CpU

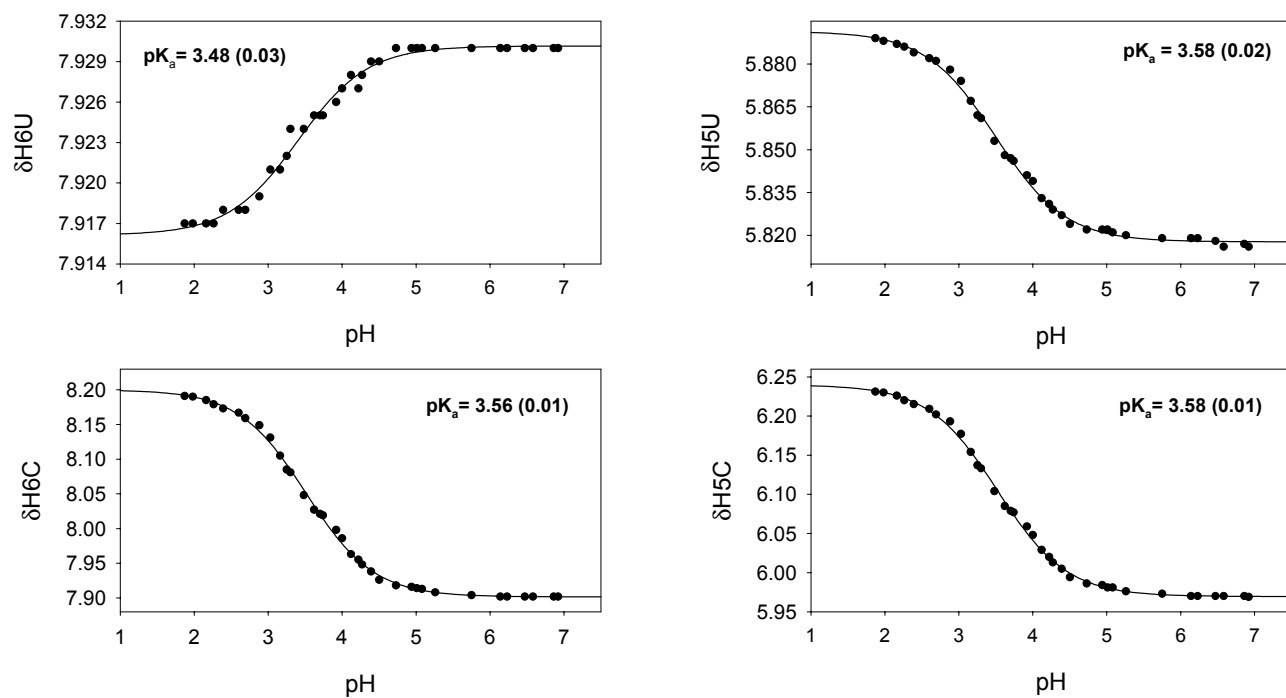

Figure S1f : CpU

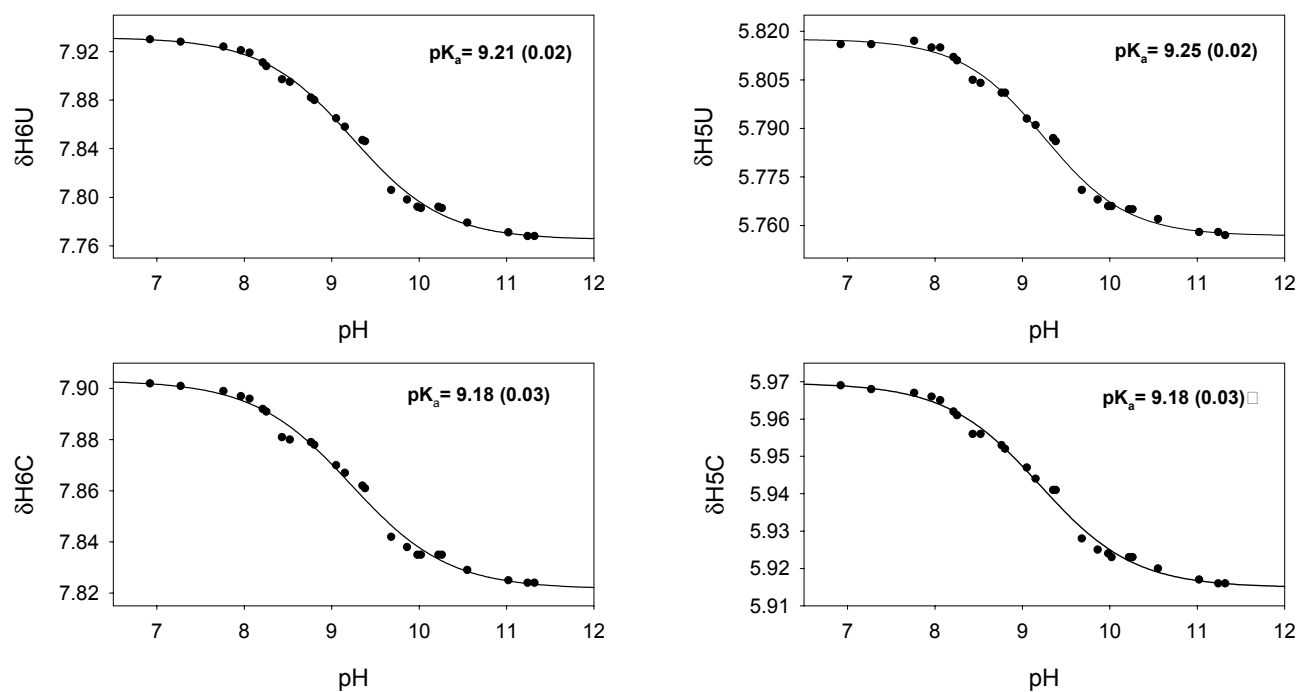

## Figures S1a - S1p

Figure S1g : UpC

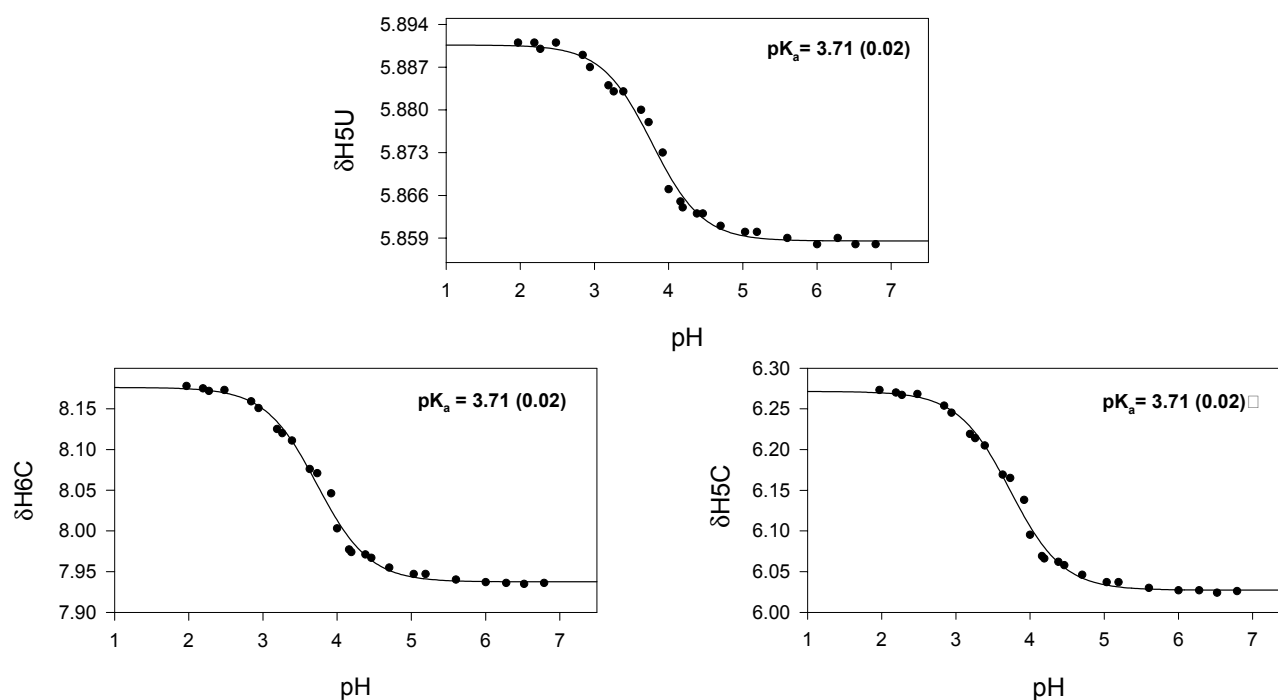

Figure S1h : UpC

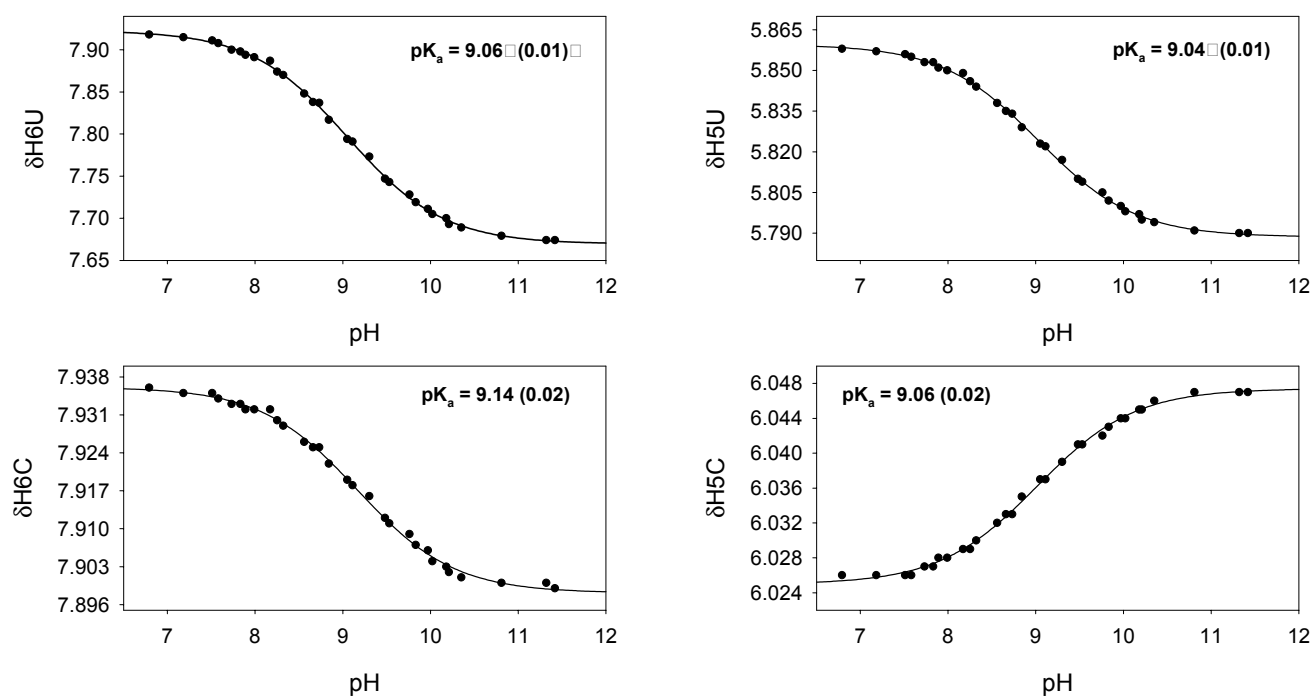

## Figures S1a - S1p

Figure S1i : UpA

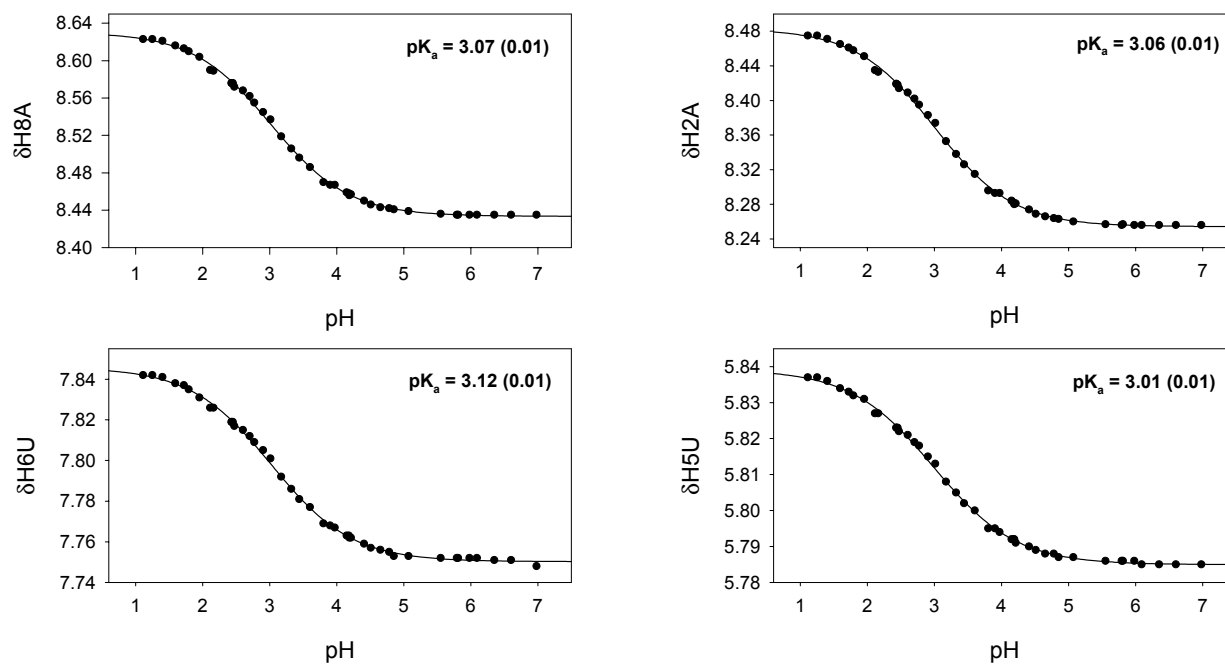

Figure S1j : UpA

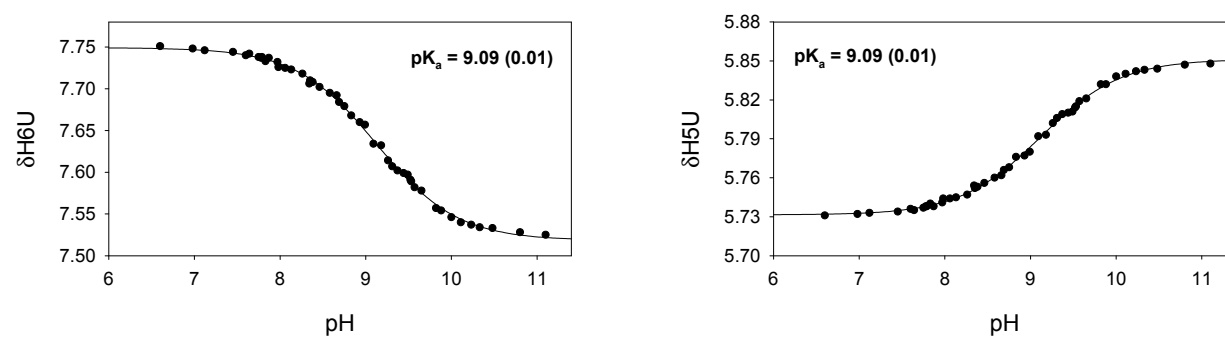



## Figures S1a - S1p

Figure S1k : ApU

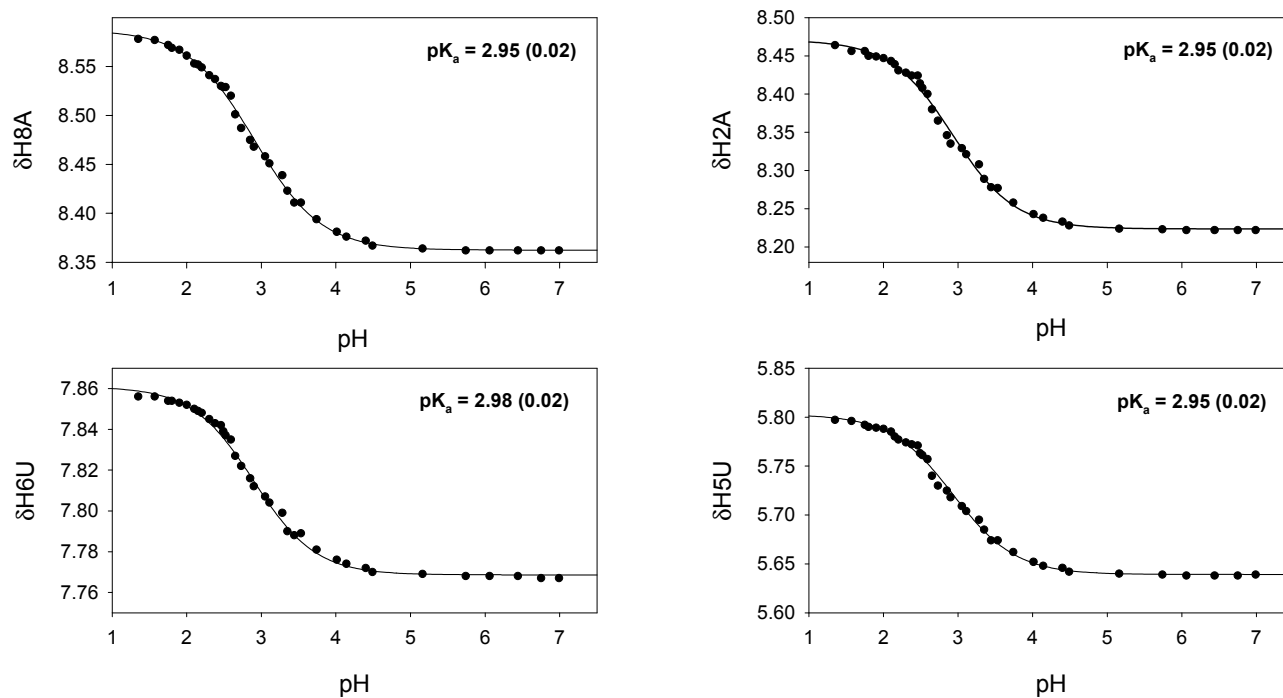

Figure S1l : ApU

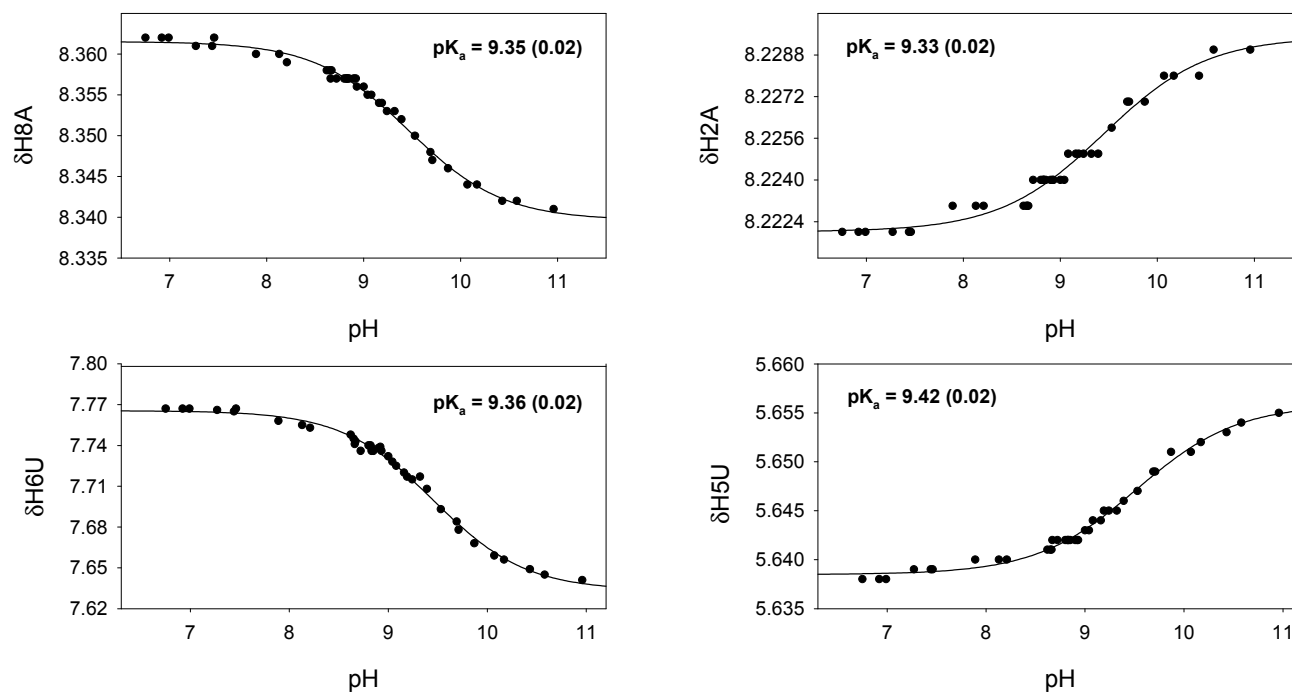

## Figures S1a - S1p

Figure S1m : ApEt

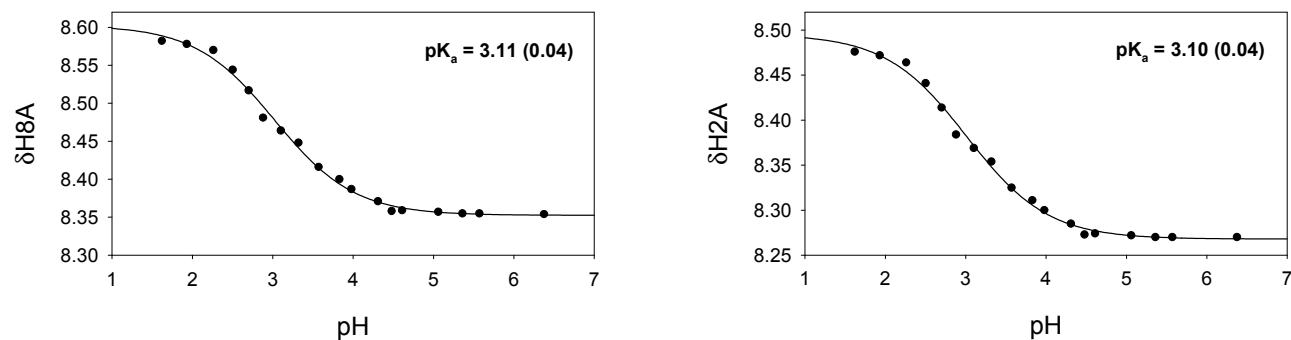

Figure S1n : GpEt

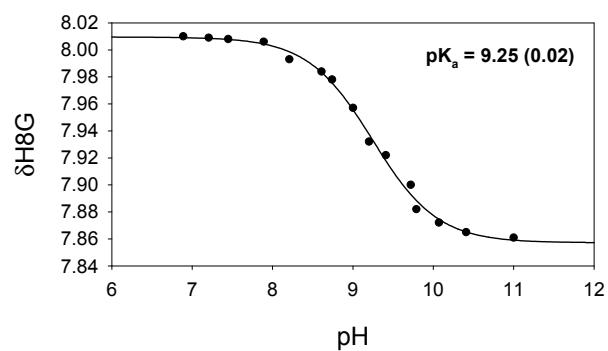

Figure S1o : UpEt

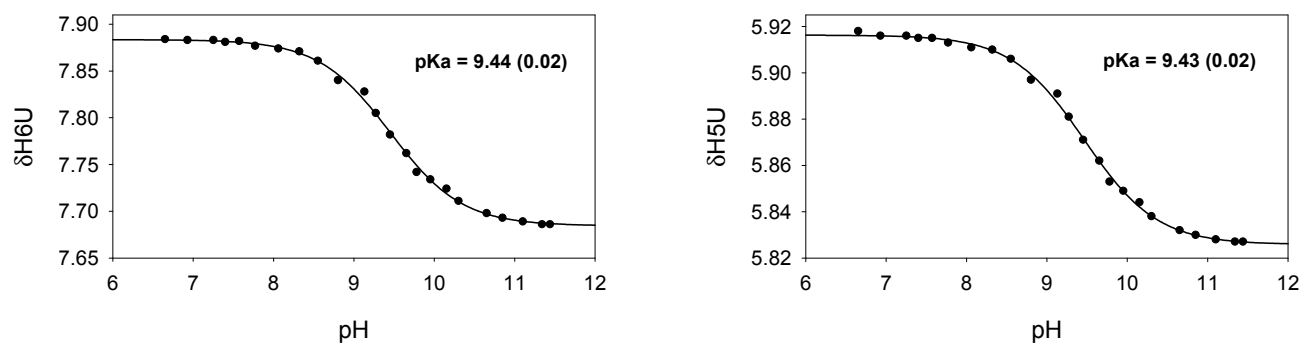

Figure S1p : CpEt

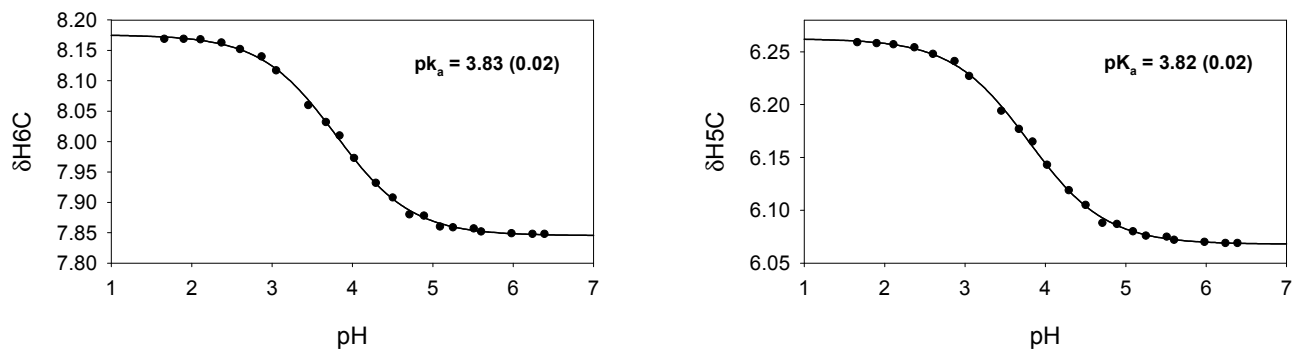

## Figures S2a - S2p

Figure S2a : ApG

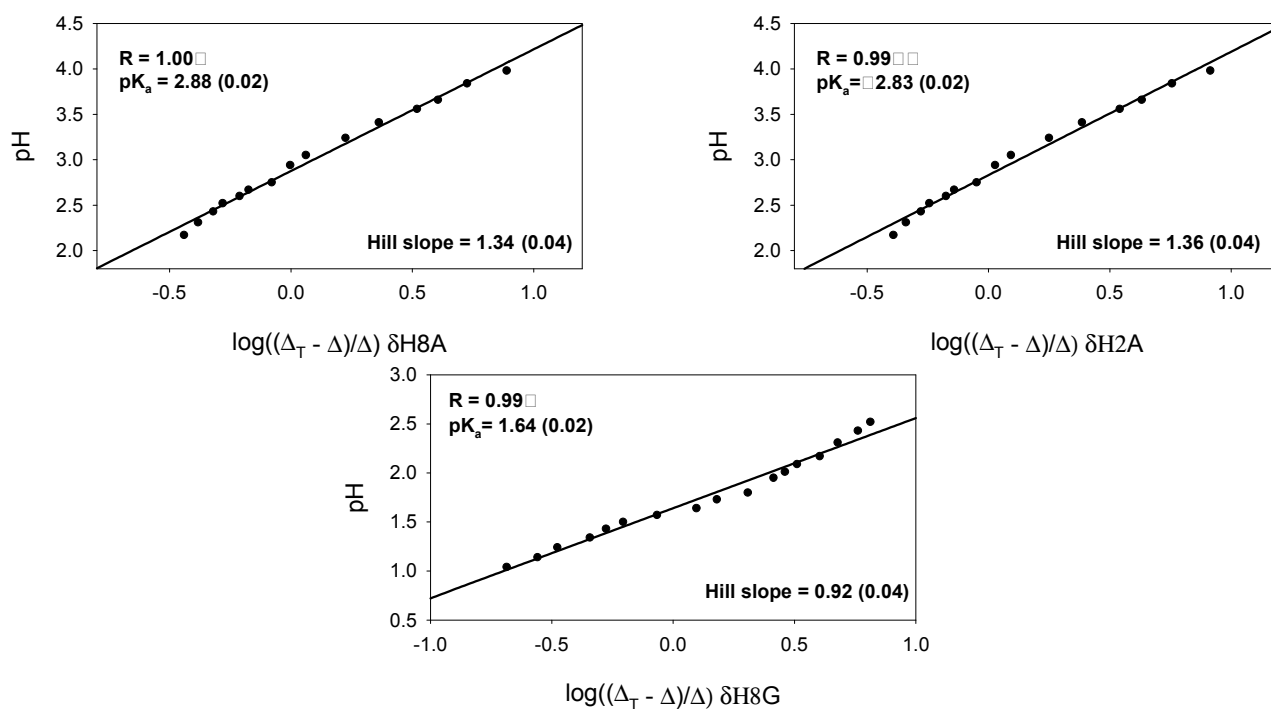

Figure S2b : ApG

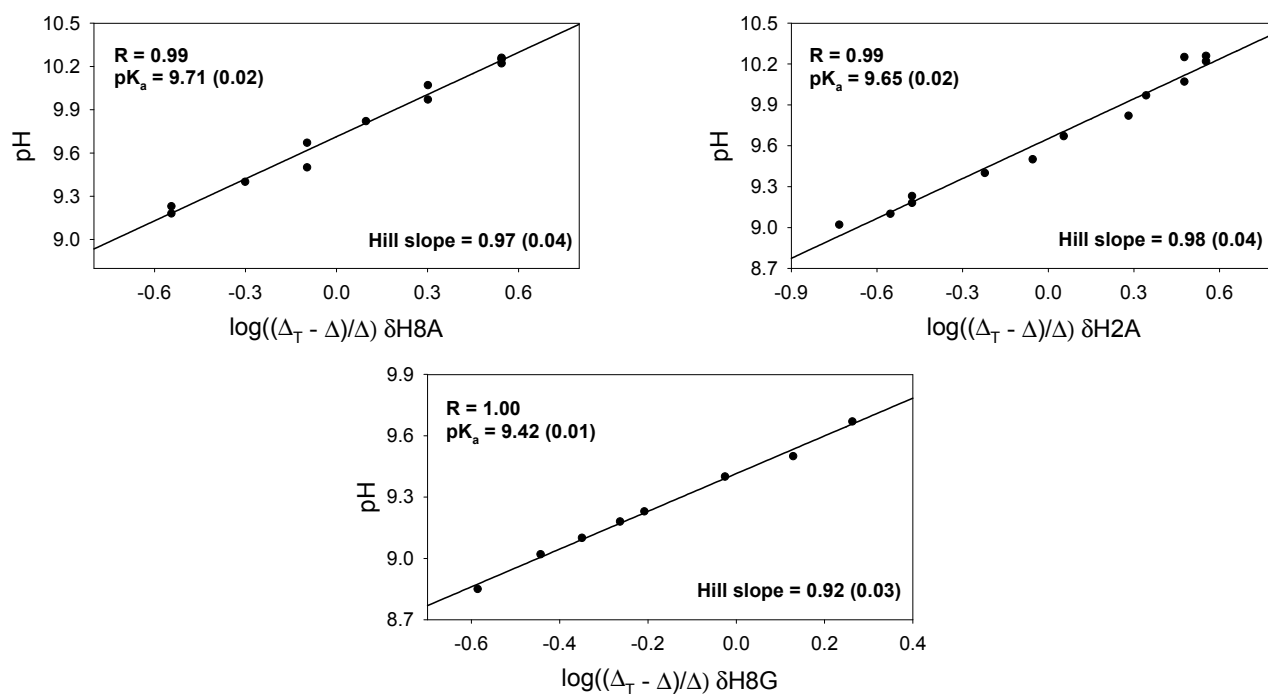

## Figures S2a - S2p

Figure S2c : GpA

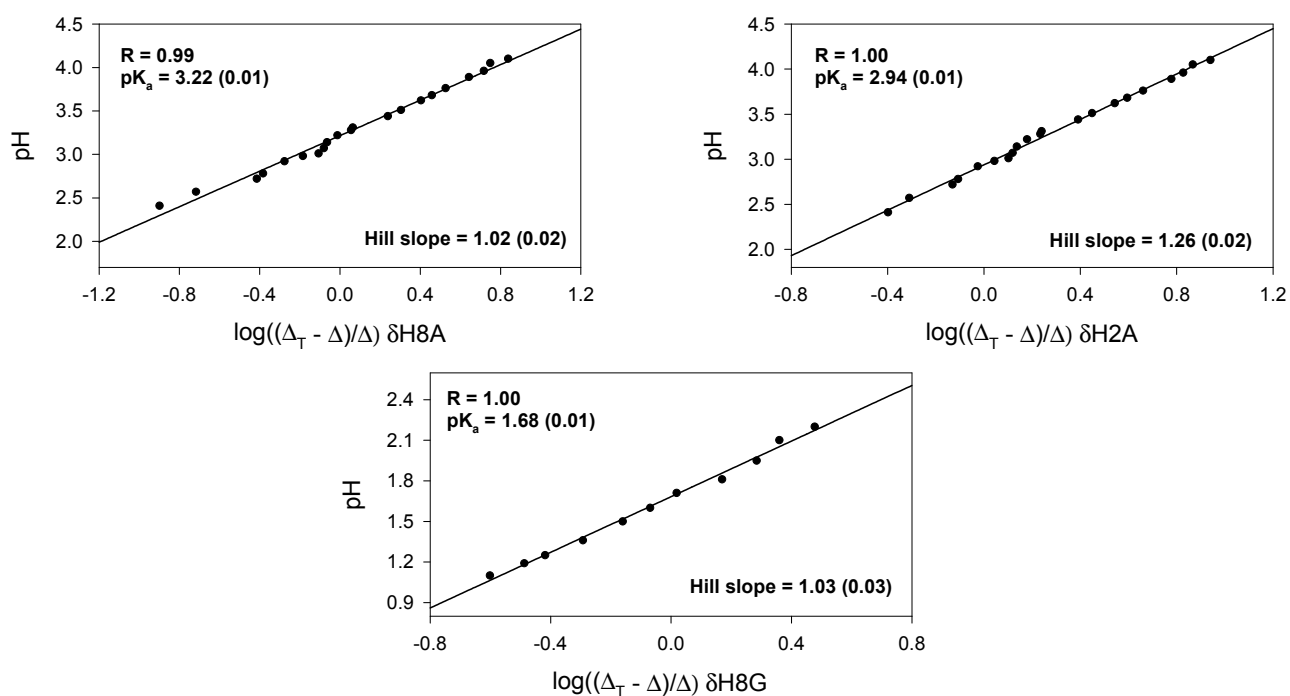

Figure S2d : GpA

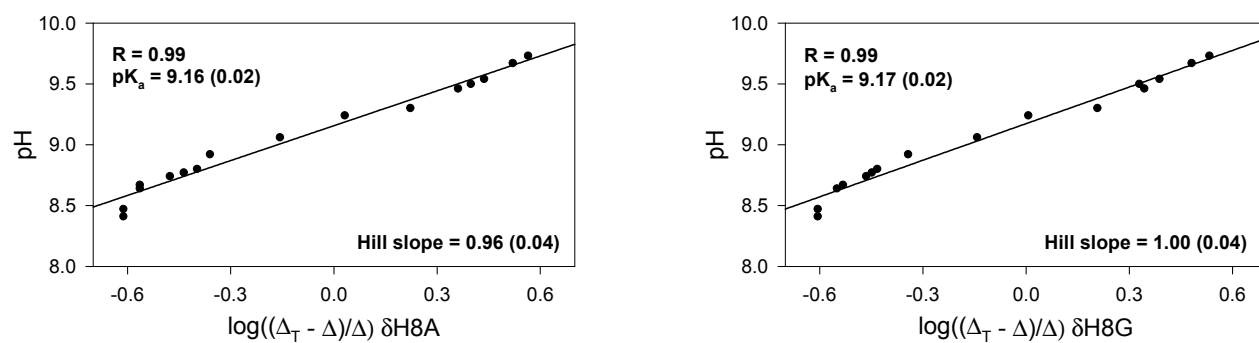

## Figures S2a - S2p

Figure S2e : CpU

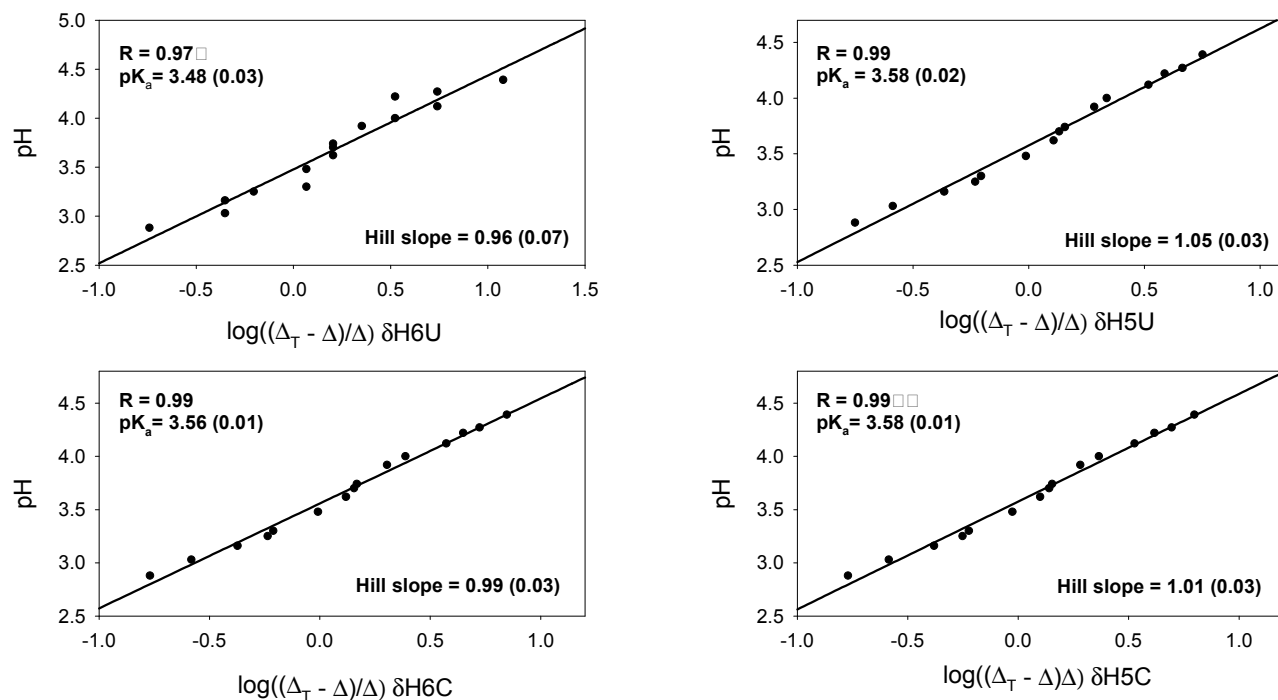

Figure S2f : CpU

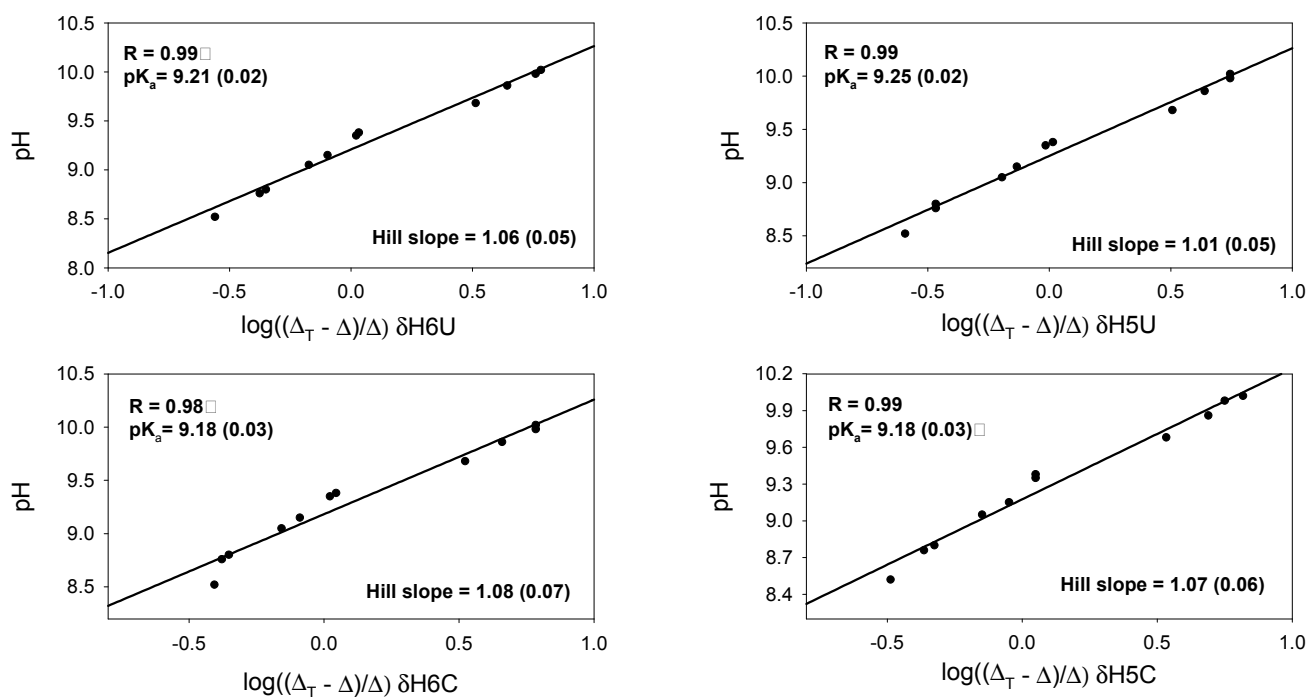

## Figures S2a - S2p

Figure S2g : UpC

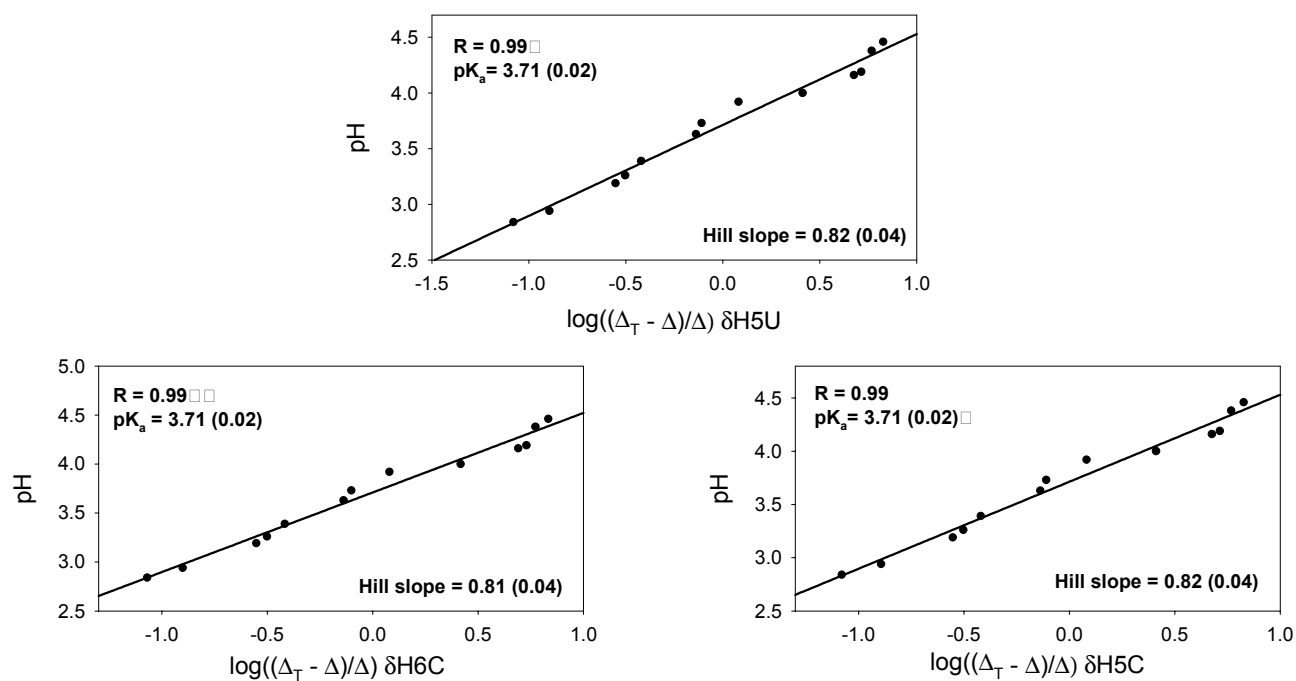

Figure S2h : UpC

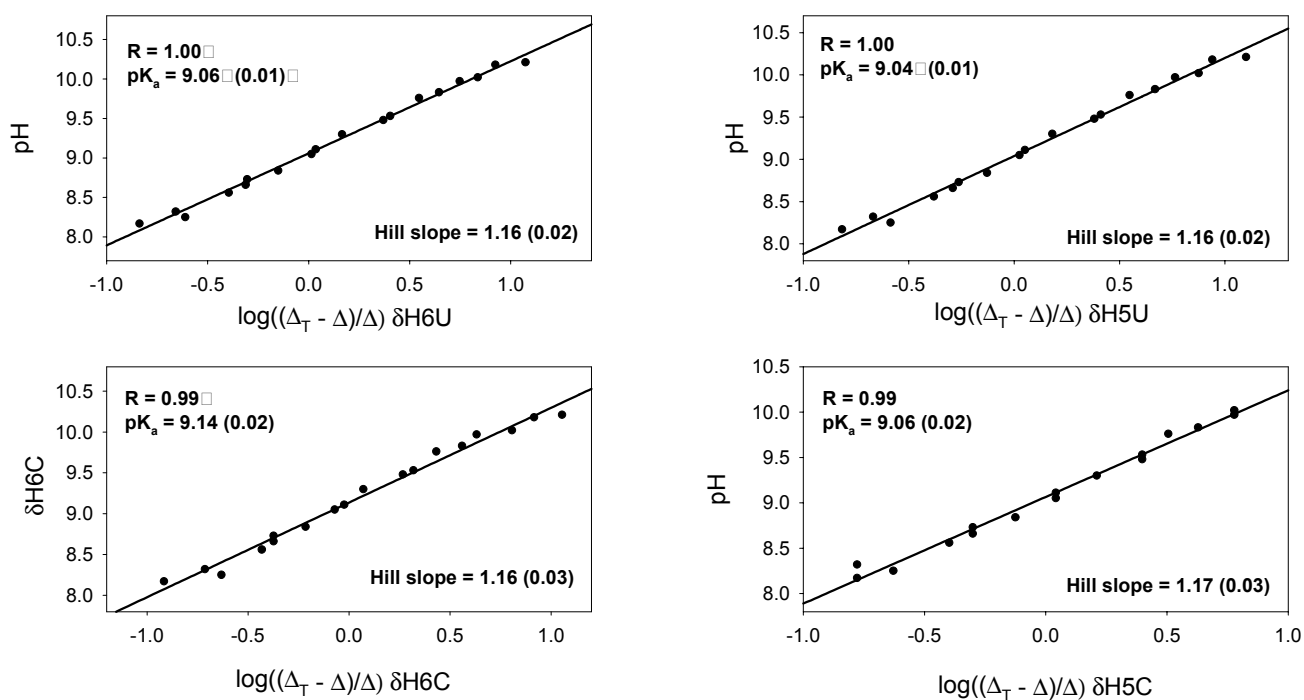

## Figures S2a - S2p

Figure S2i : UpA

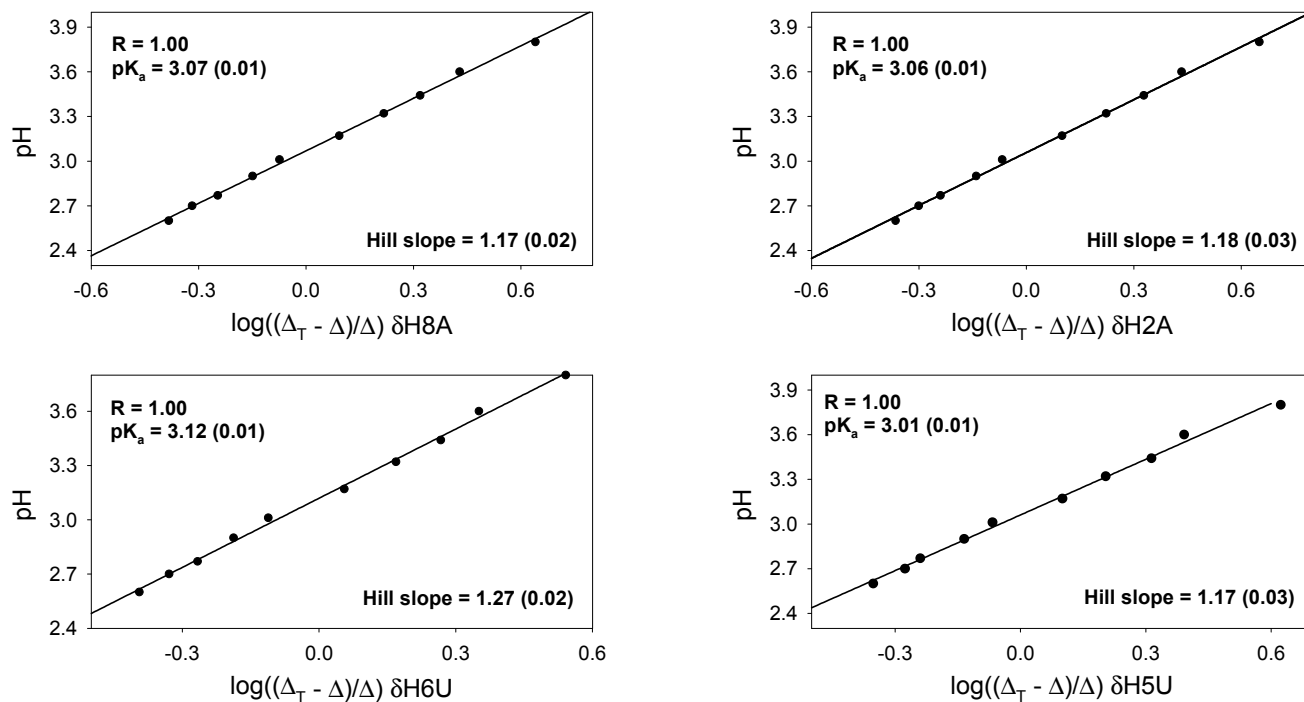

Figure S2j : UpA

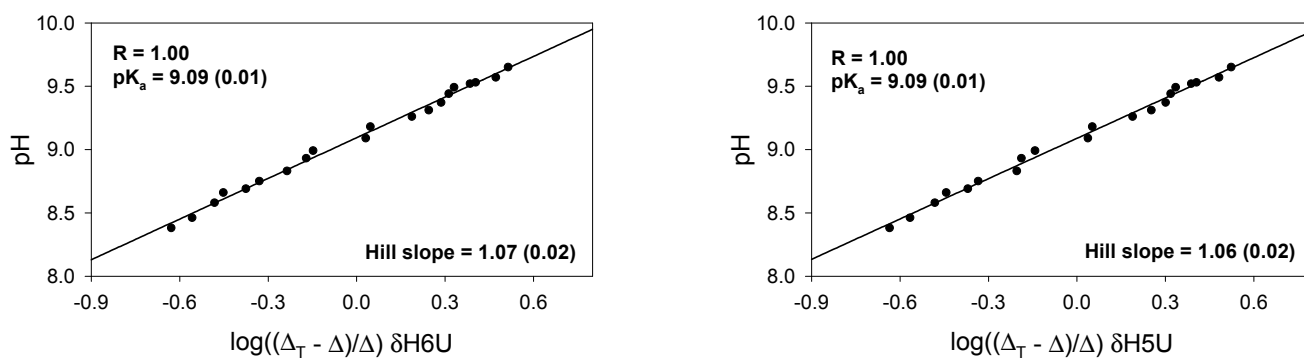

## Figures S2a - S2p

Figure S2k : ApU

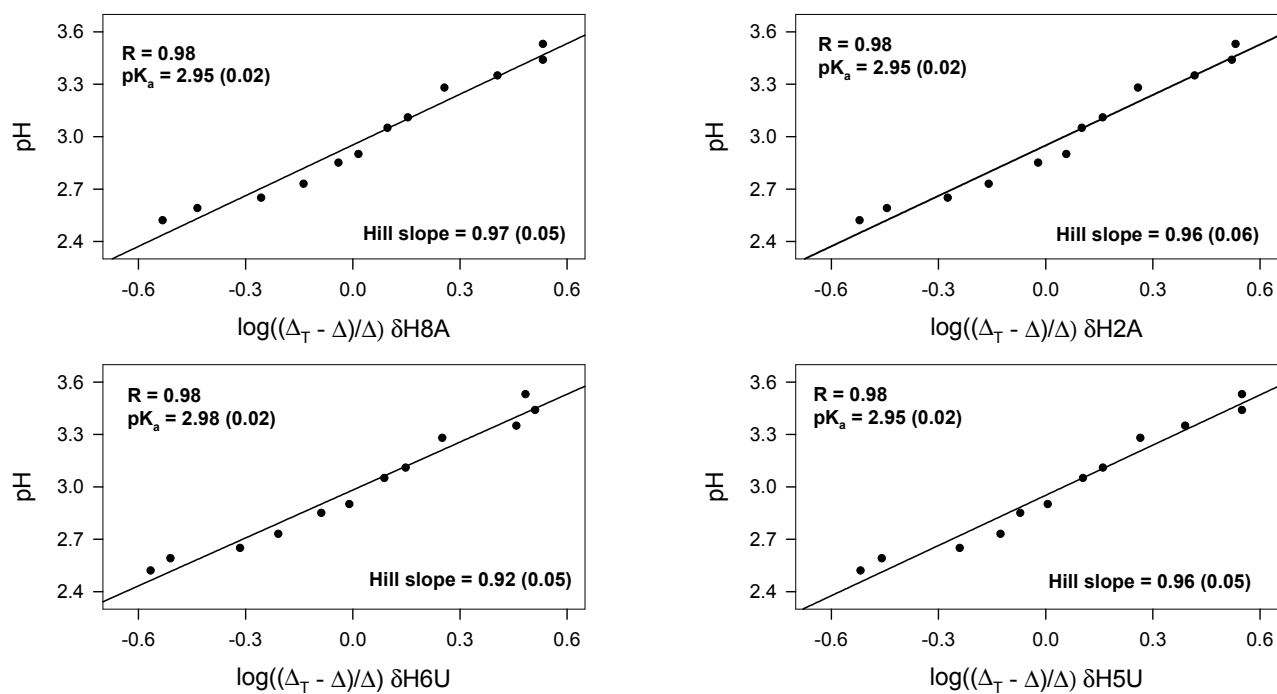

Figure S2l : ApU

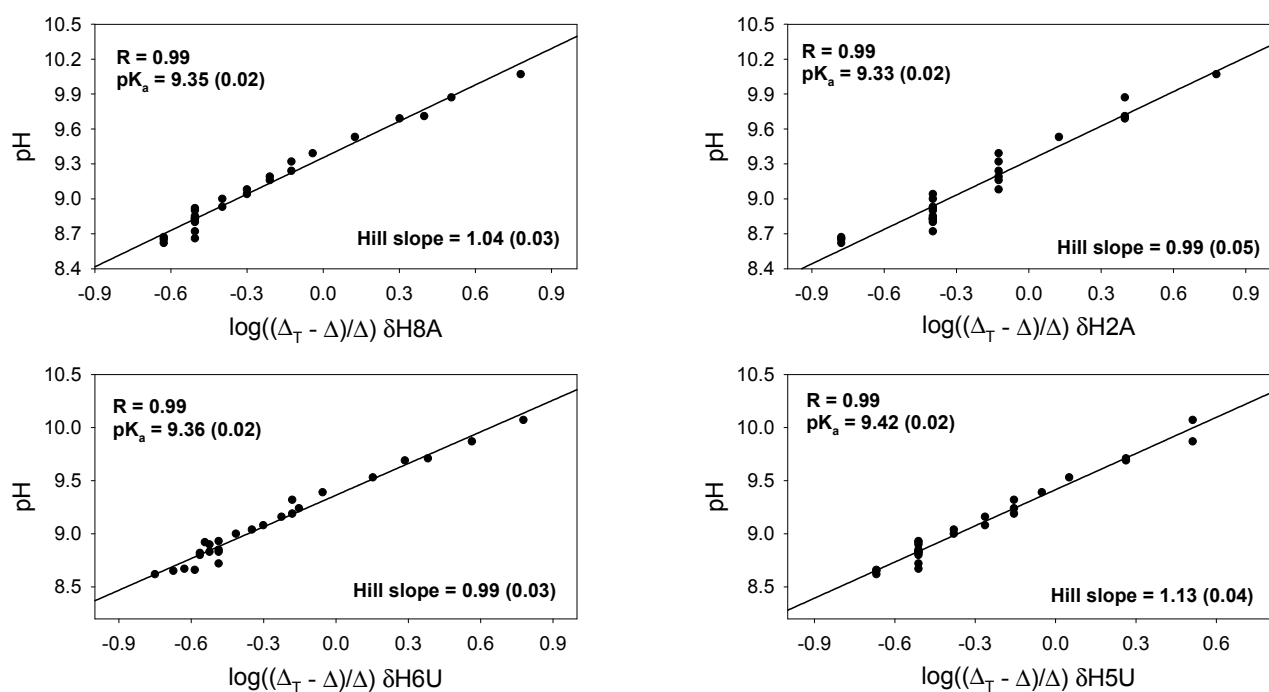



## Figures S2a - S2p

Figure S2m : ApEt

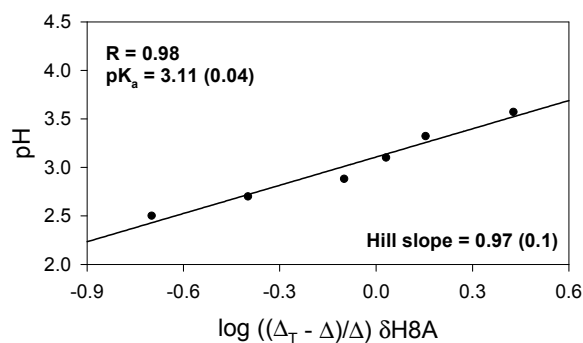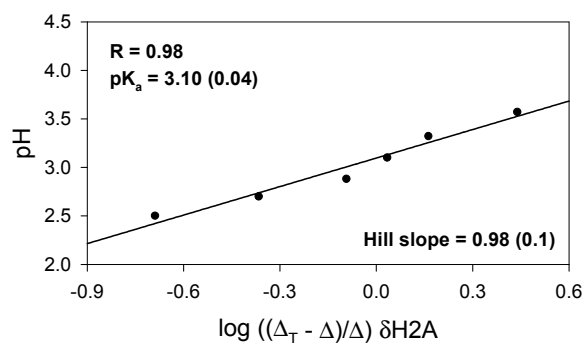

Figure S2n : GpEt

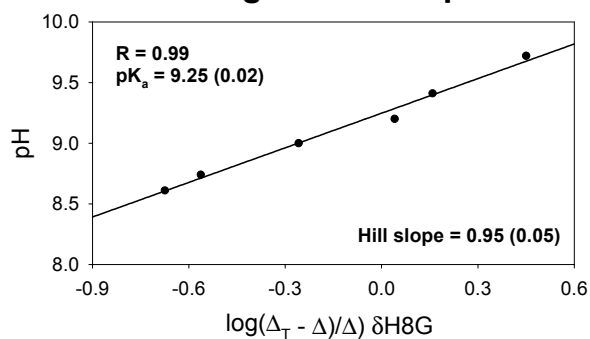

Figure S2o : UpEt

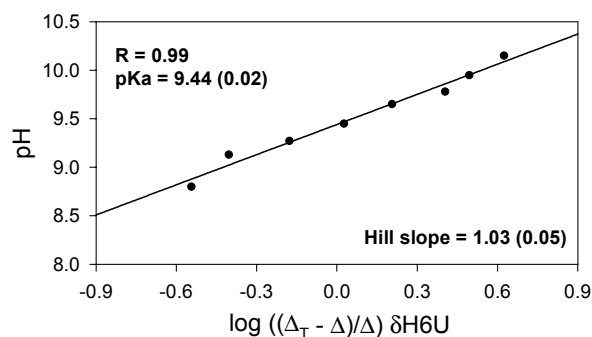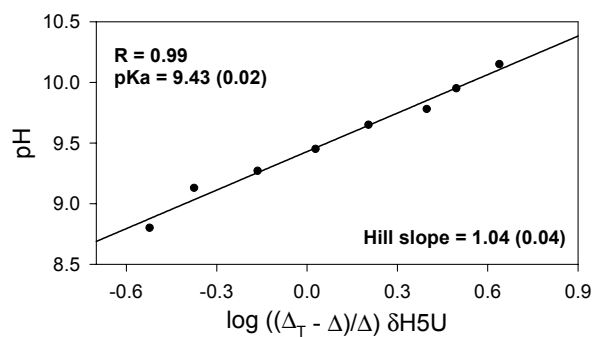

Figure S2p : CpEt

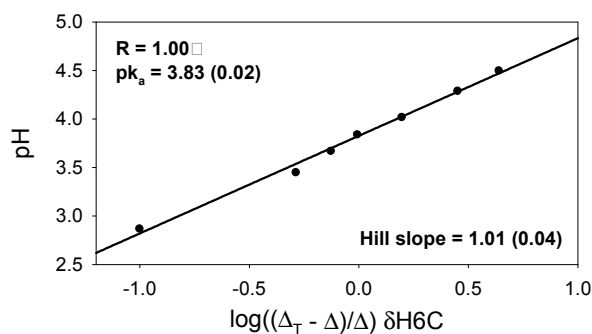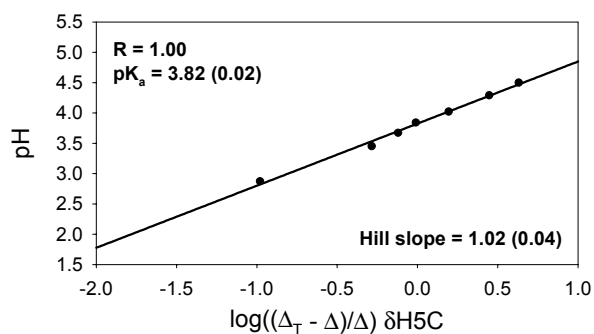

## Figures S3a - S3p

## (3a): ApG

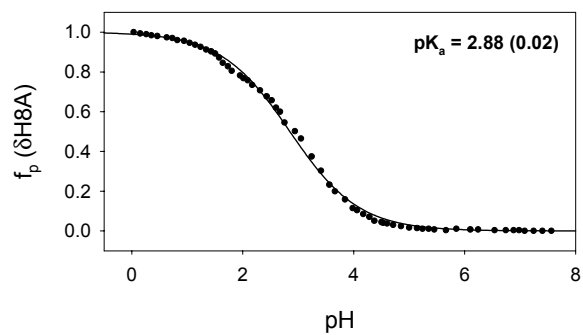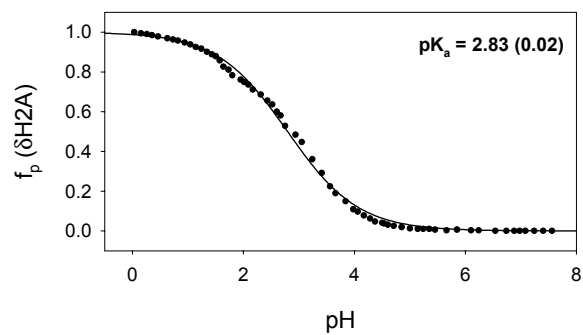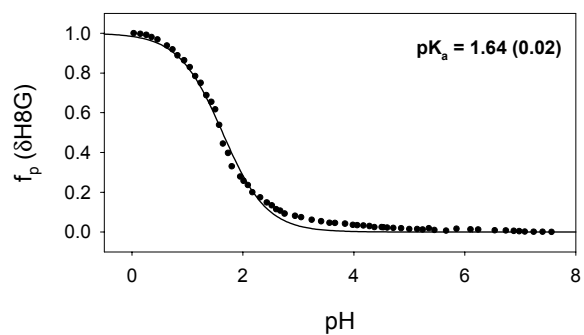

## (3b): ApG

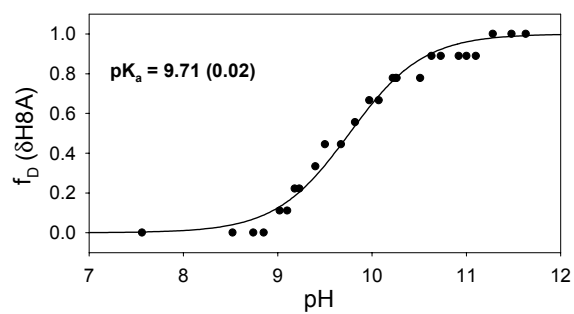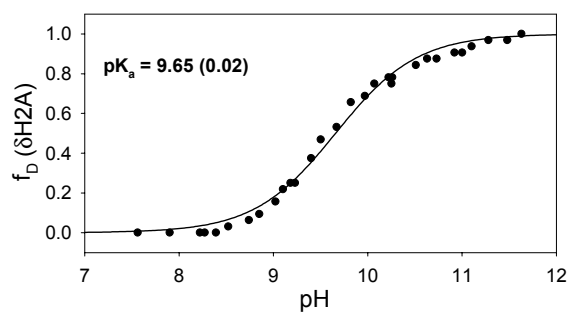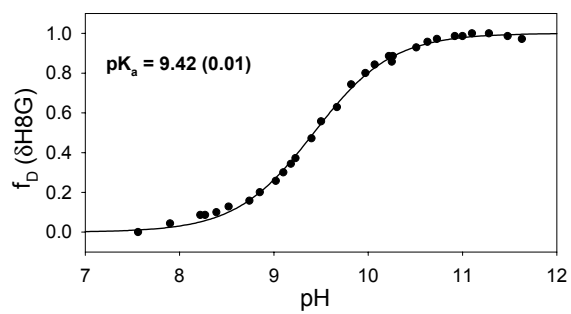

## Figures S3a - S3p

## (3c): GpA

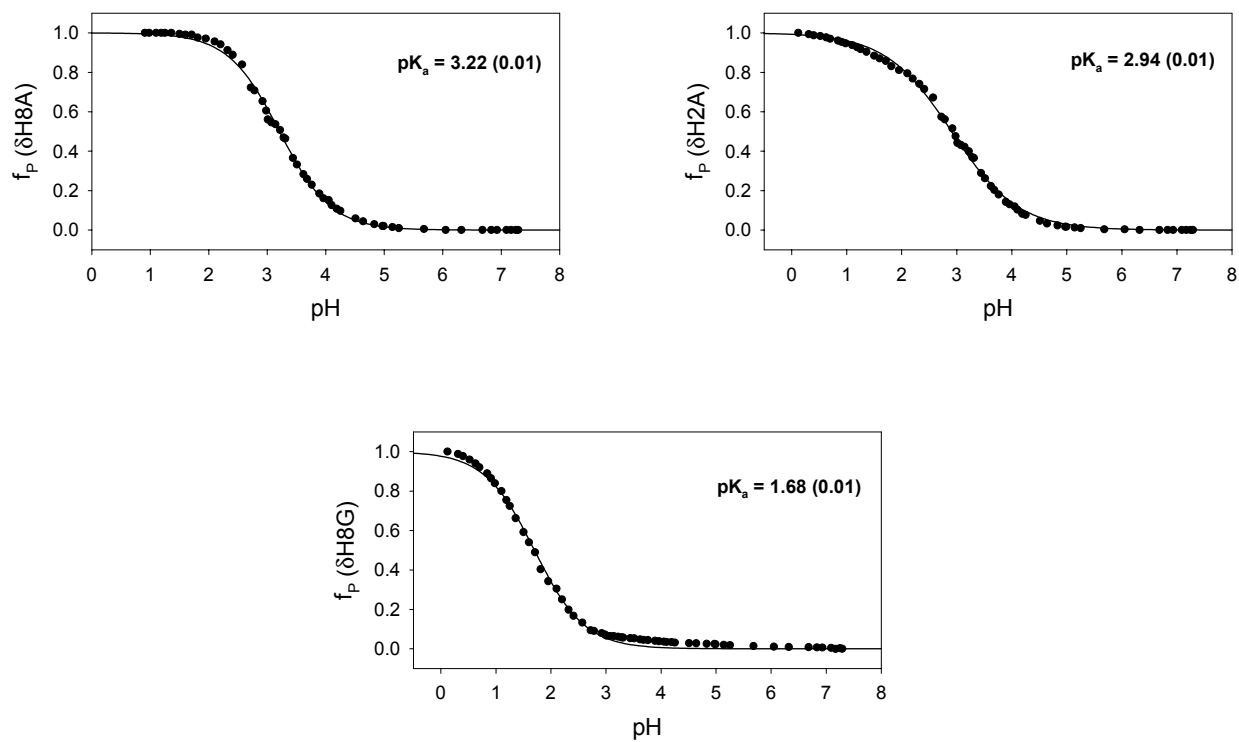

## (3d): GpA

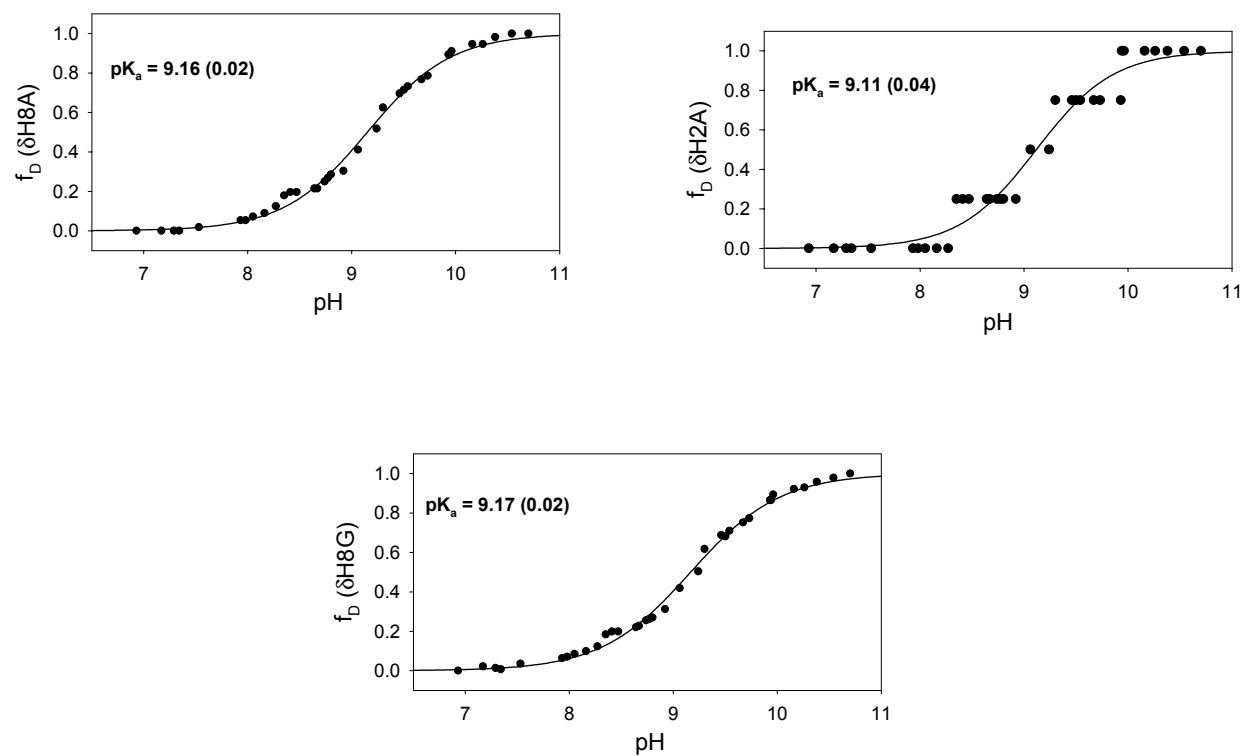

## Figures S3a - S3p

## (3e): CpU

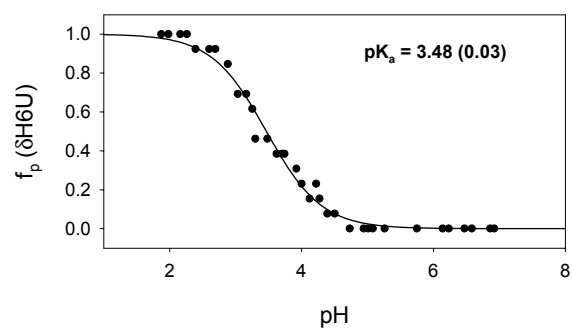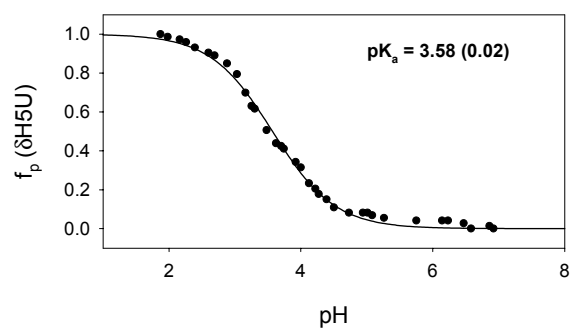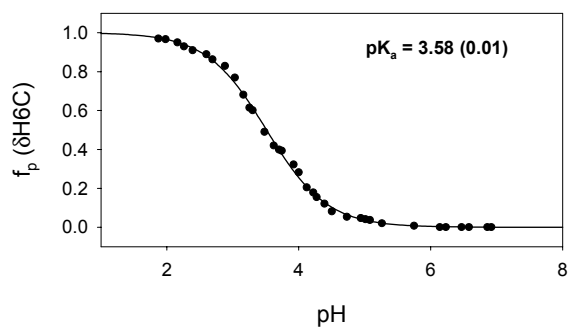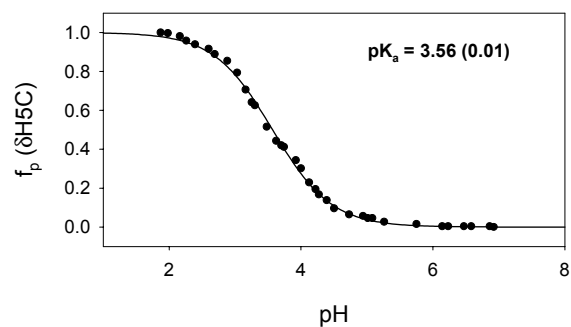

## (3f): CpU

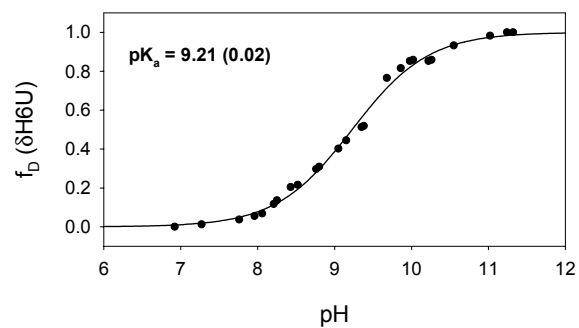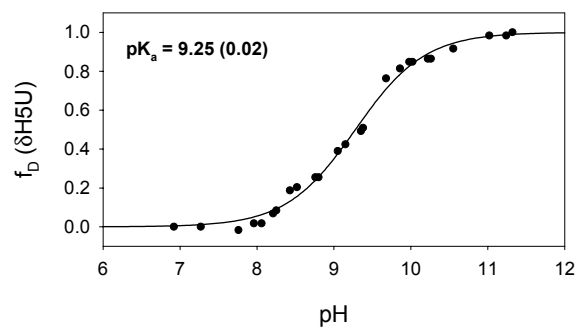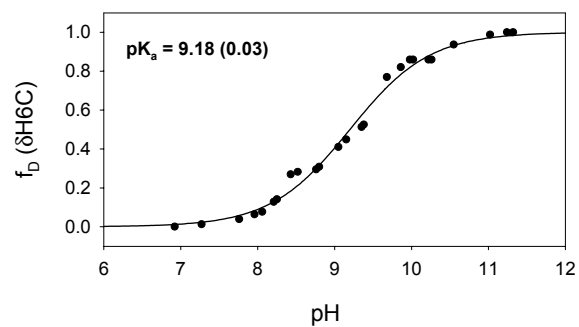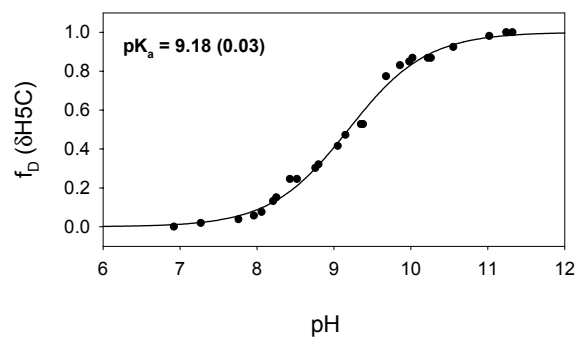

## Figures S3a - S3p

## (3g): UpC

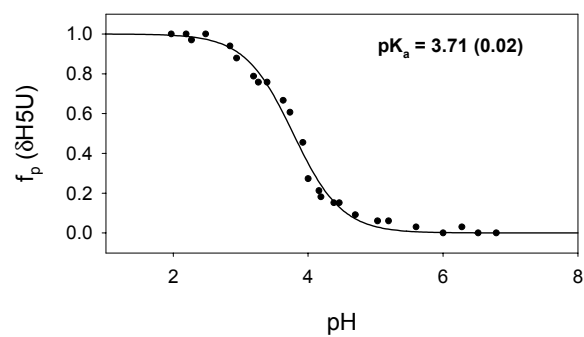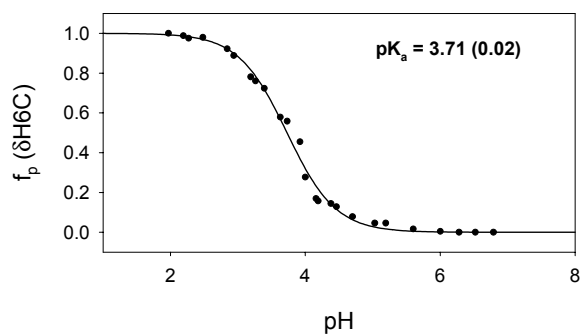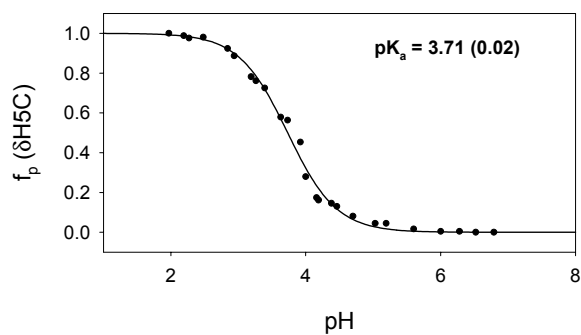

## (3h): UpC

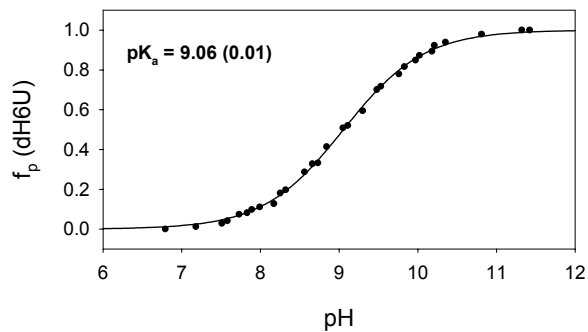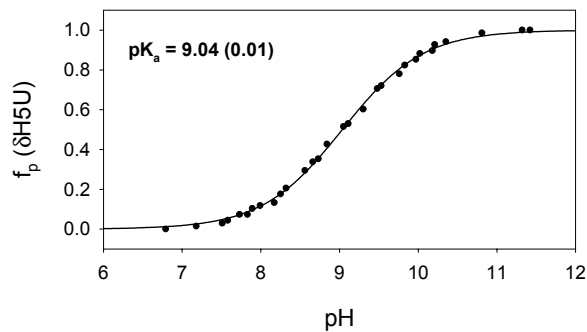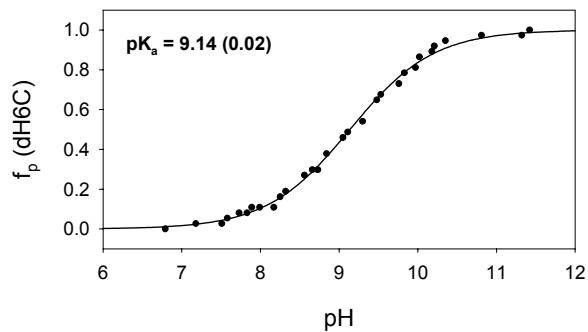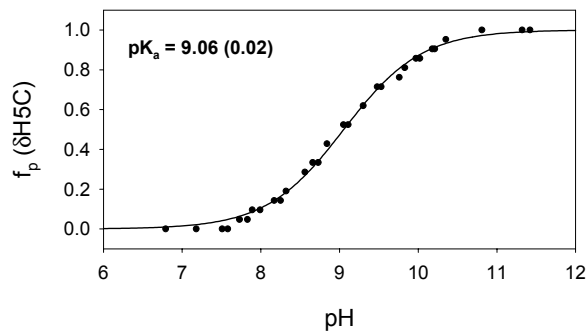

Figures S3a - S3p

(3i): UpA

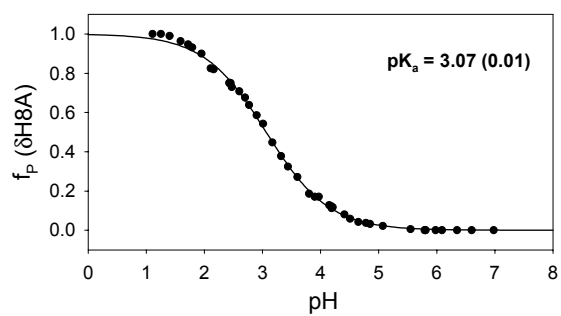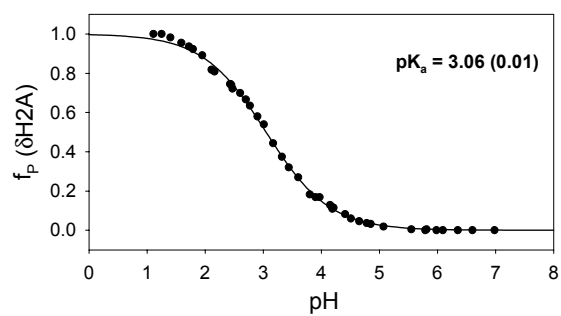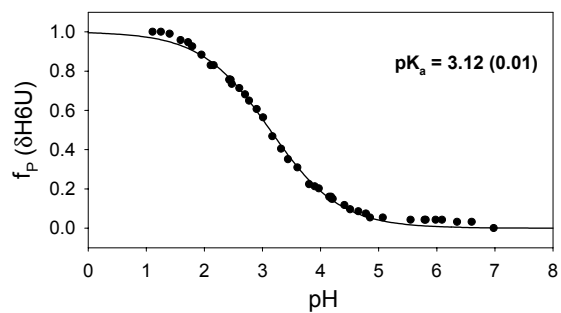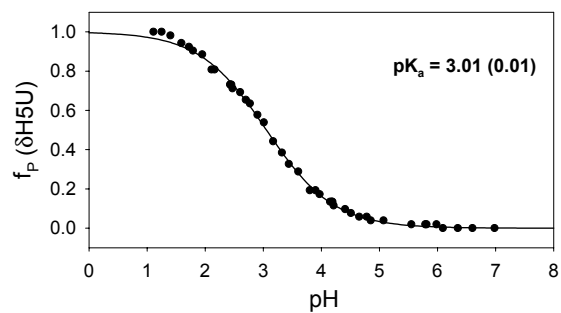

(3j): UpA

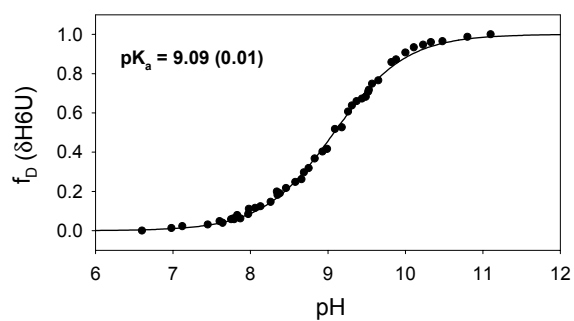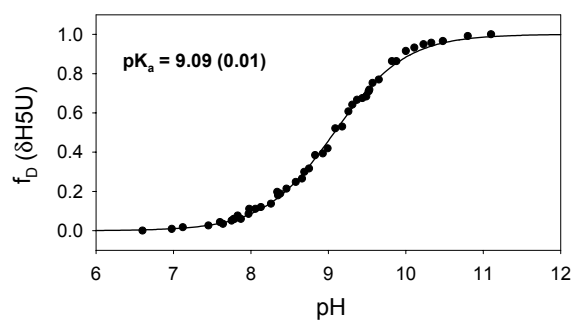

Figures S3a - S3p

(3k): ApU

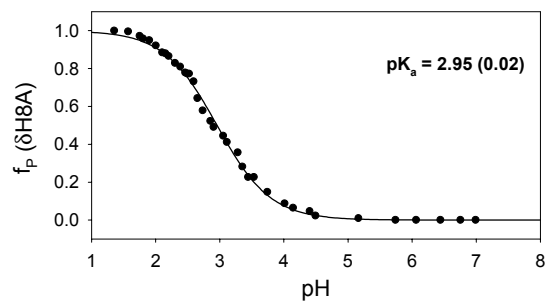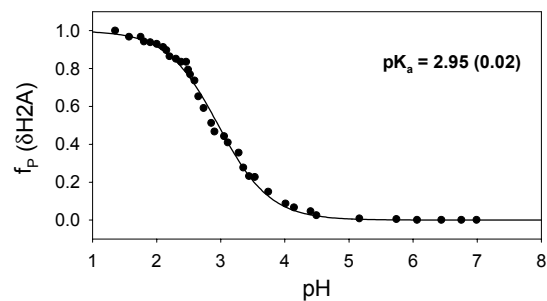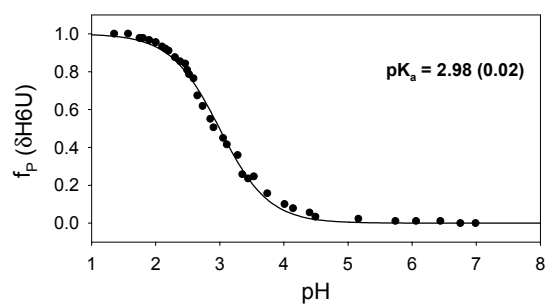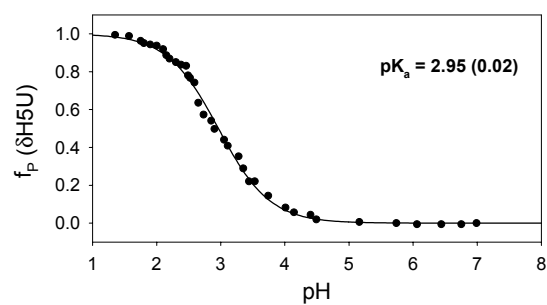

(3l): ApU

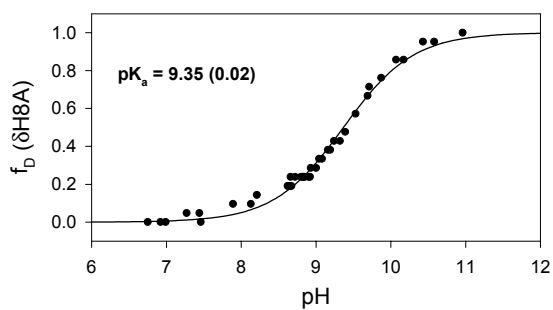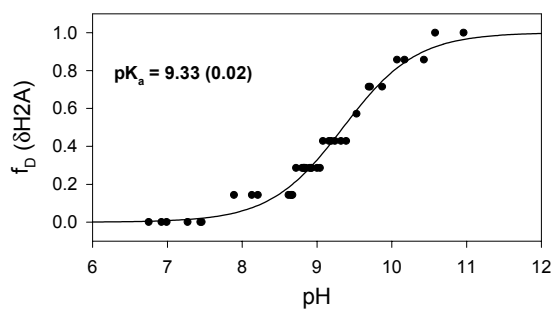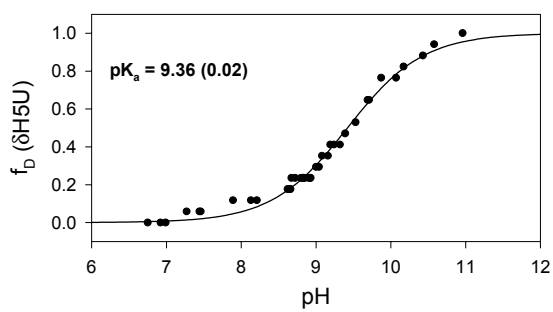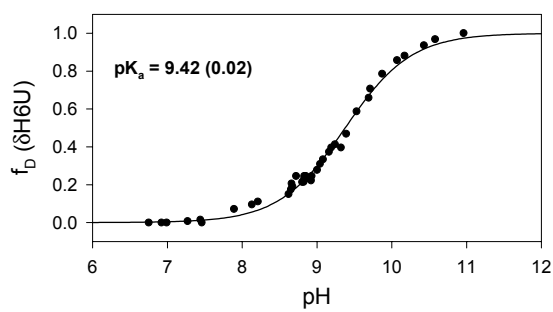

Figures S3a - S3p

**(3m): ApEt**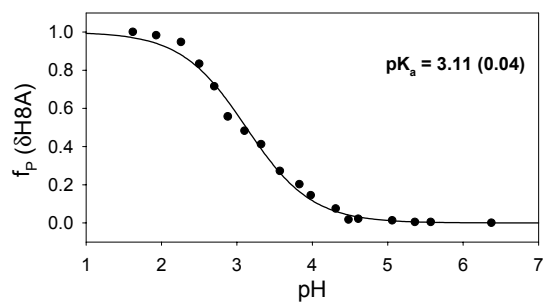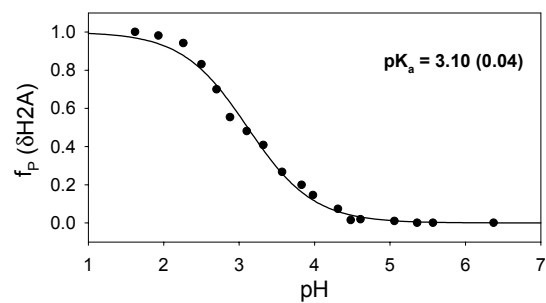**(3n): GpEt**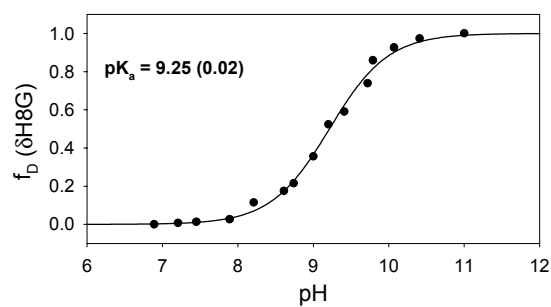**(3o): UpEt**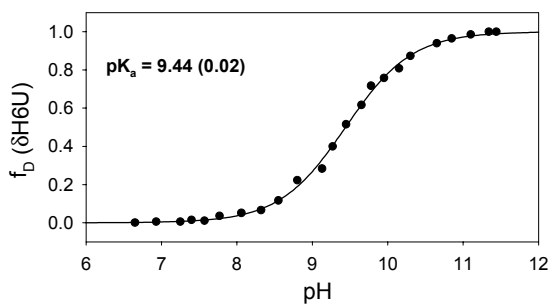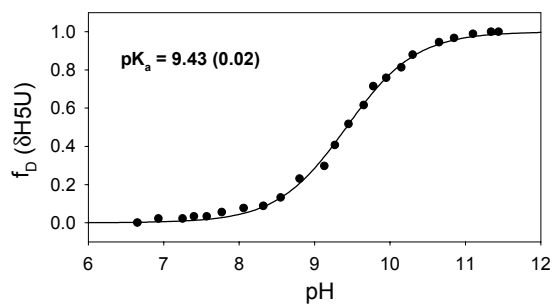**(3p): CpEt**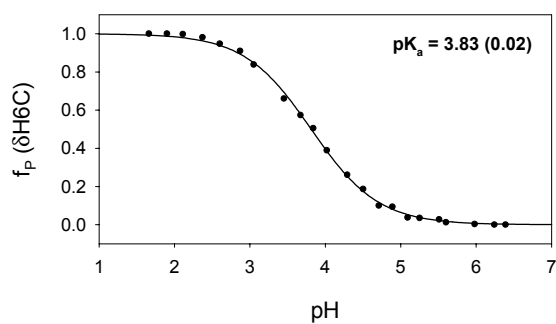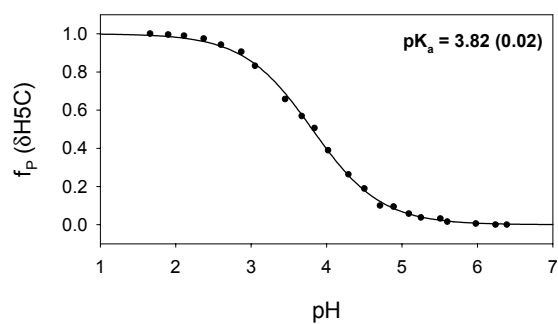



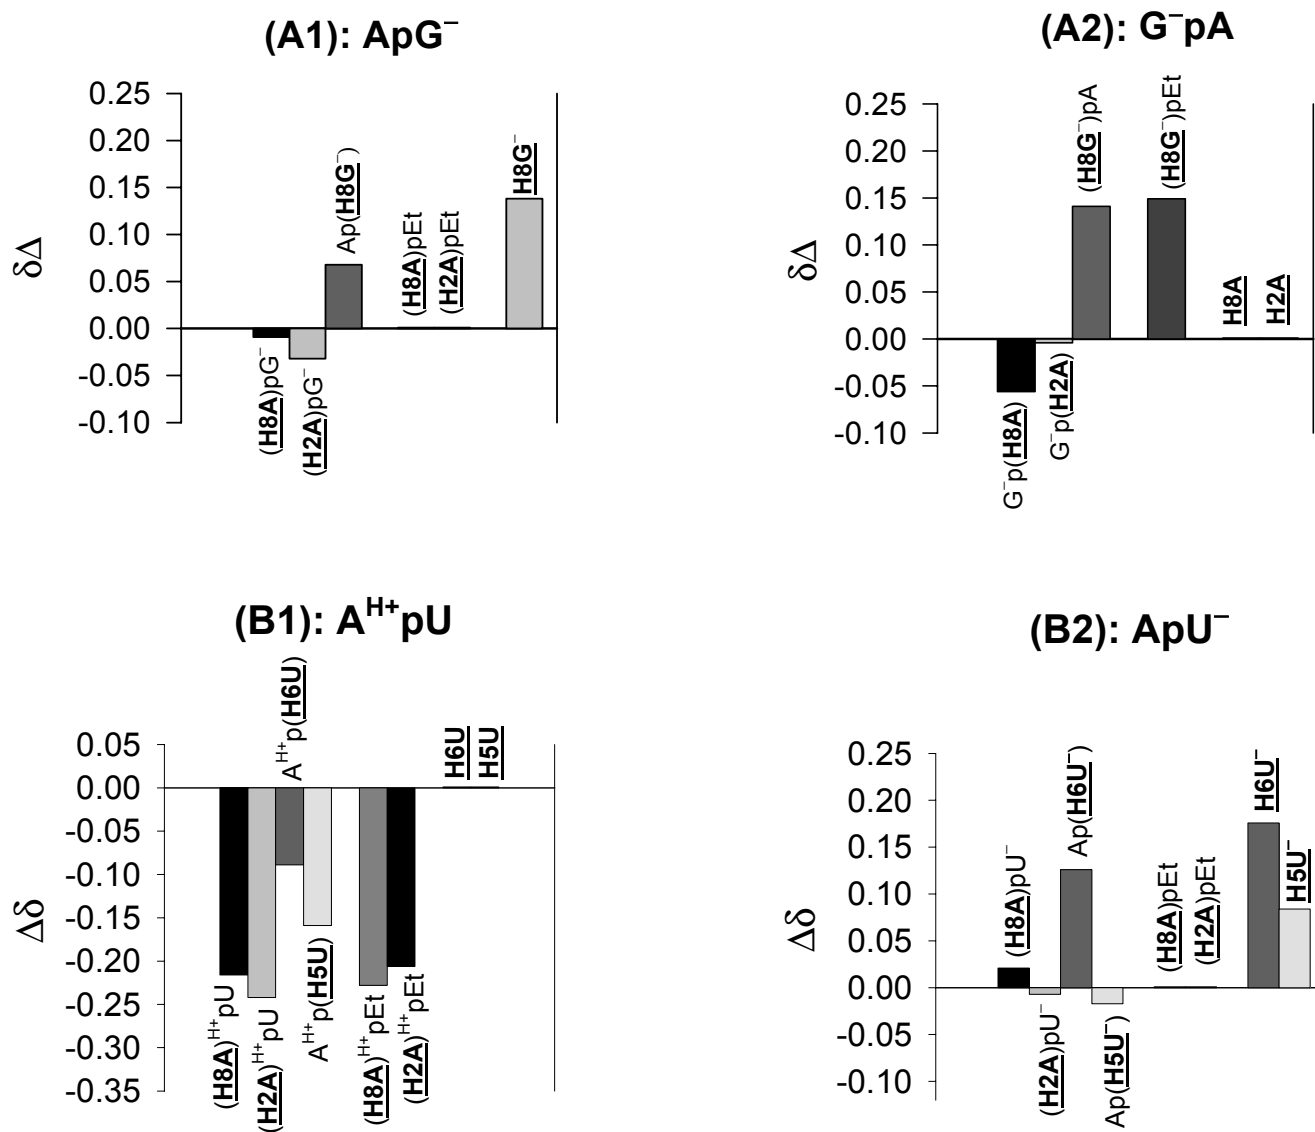

Figure S4

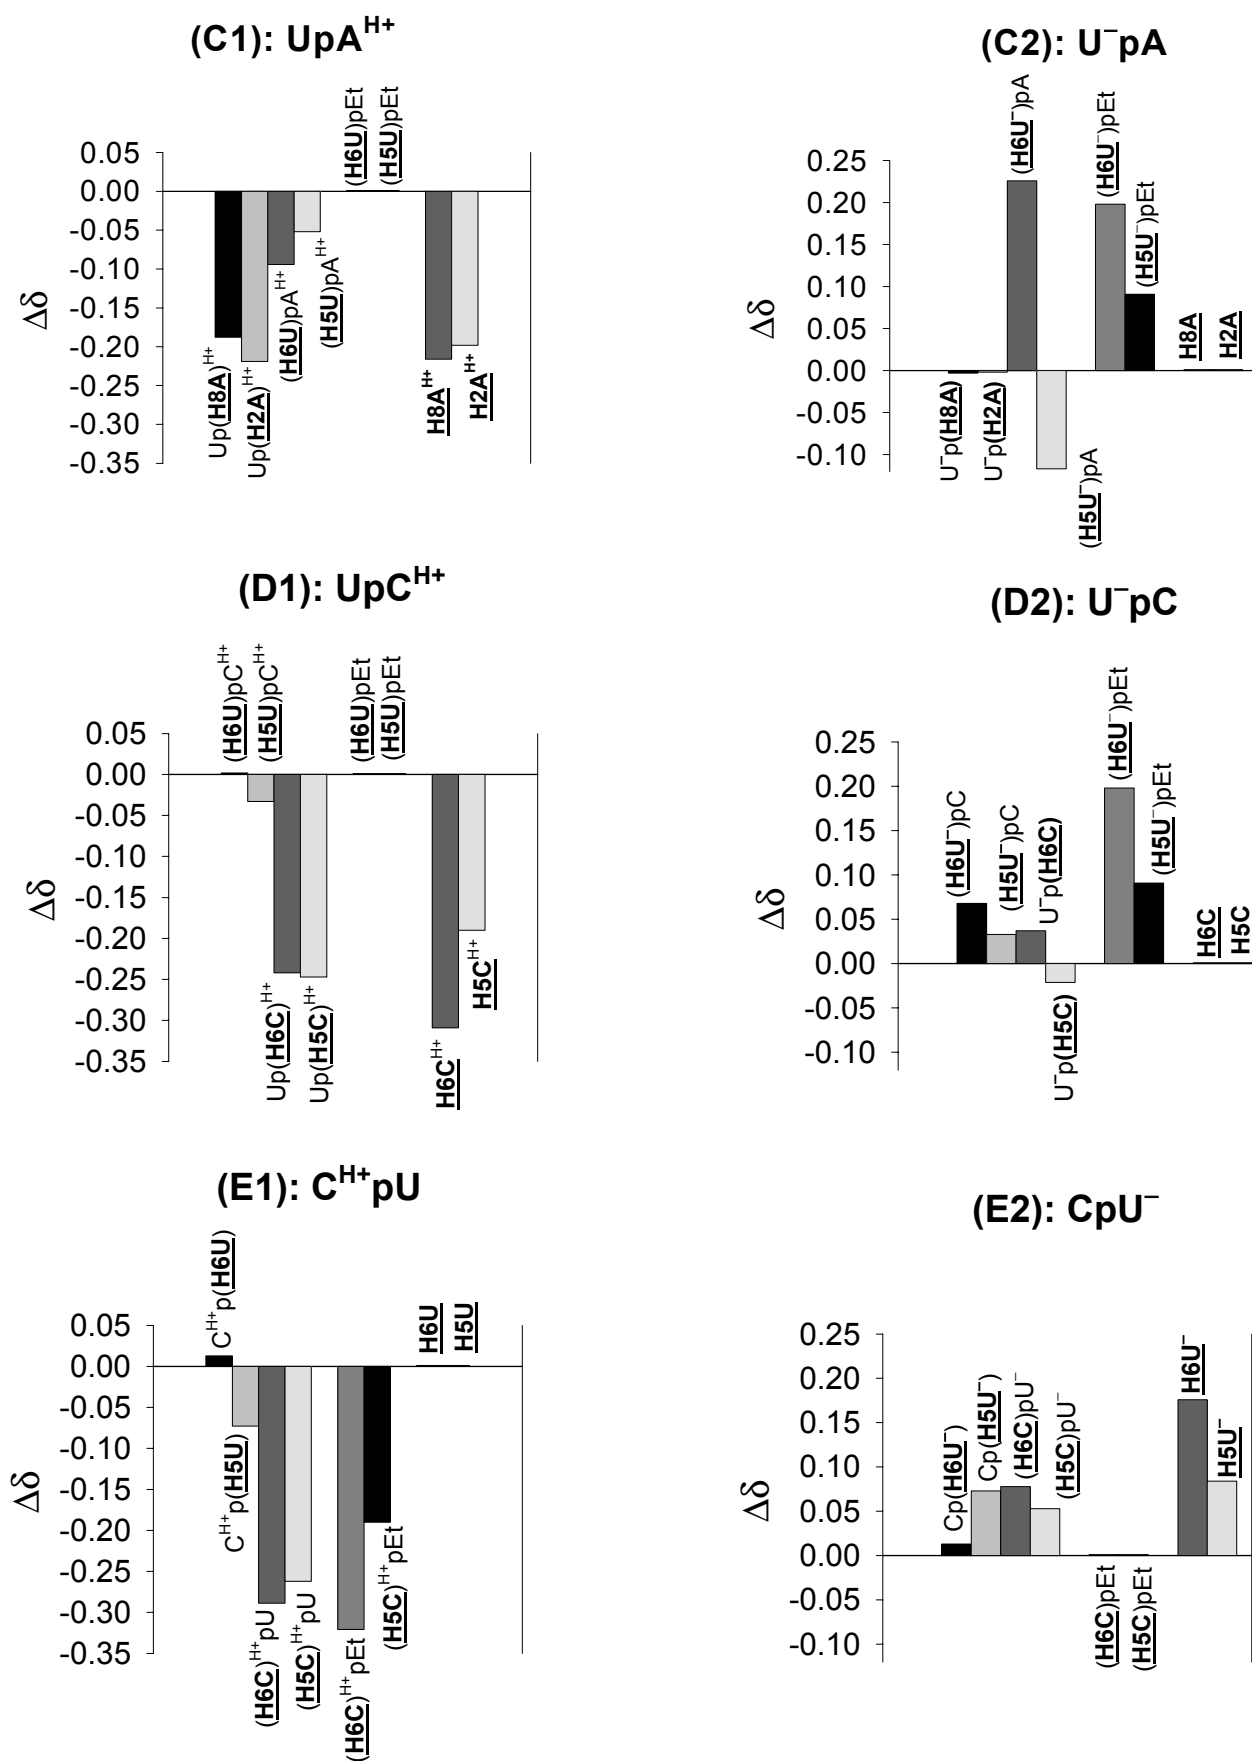

Figure S4

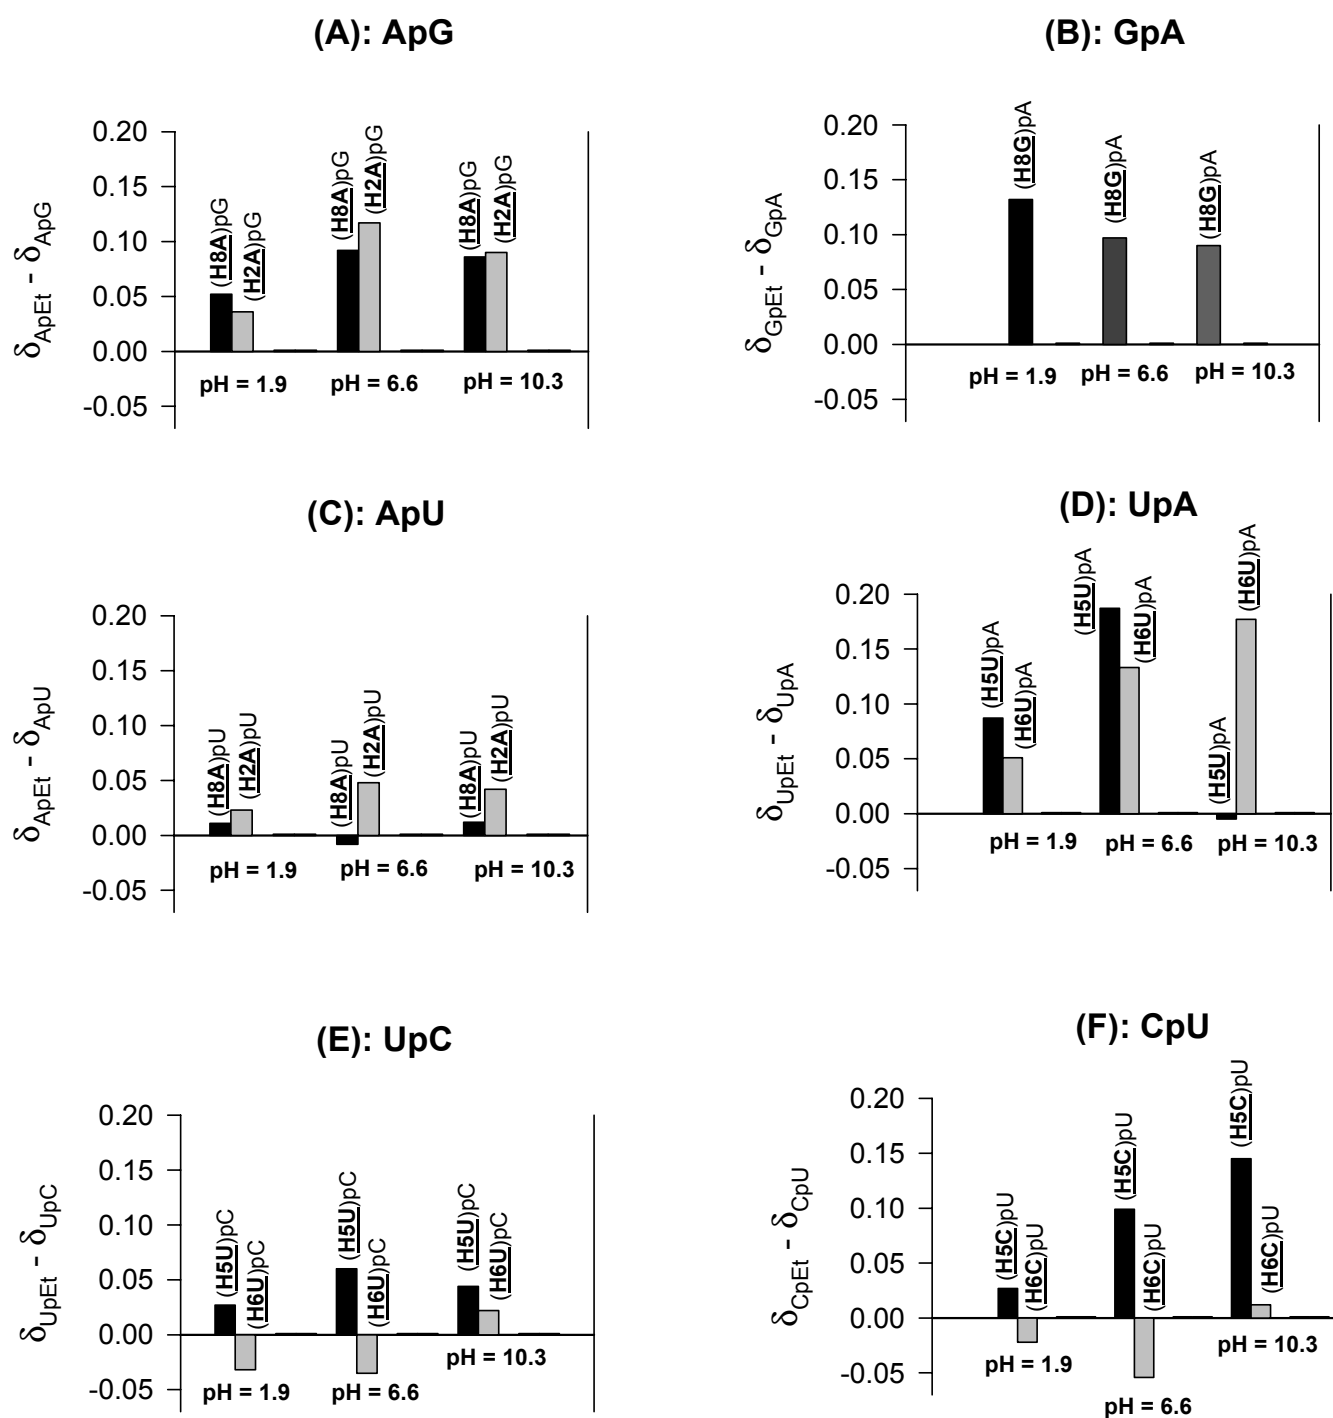

Figure S5

**Table S1.** pH-dependent  $^3J_{\text{HH}}$  ( $\pm 0.1$ )<sup>a</sup>, percentage population of N-type pseudorotamer<sup>6</sup> (% N) and corresponding free energy ( $\Delta G_{\text{N/S}(298\text{ K})}^\circ$ )<sup>b</sup> and Stacking free energy ( $\Delta\Delta G^\circ$ )<sup>c</sup> from  $^1\text{H}$  NMR at 298 K for **1** – **10** in  $\text{D}_2\text{O}$ .

| Compd.     |    | pH = 1.9 ( $\pm 0.1$ ) |                  |                |                 |                  |                        | pH = 6.6 ( $\pm 0.1$ ) |                |                |                 |                  |                        | pH = 10.3 ( $\pm 0.1$ ) |                  |                |                 |                  |                        |
|------------|----|------------------------|------------------|----------------|-----------------|------------------|------------------------|------------------------|----------------|----------------|-----------------|------------------|------------------------|-------------------------|------------------|----------------|-----------------|------------------|------------------------|
|            |    | $^3J_{1'2'}$           | $^3J_{2'3'}$     | $^3J_{3'4'}$   | % N             | $\Delta G^\circ$ | $\Delta\Delta G^\circ$ | $^3J_{1'2'}$           | $^3J_{2'3'}$   | $^3J_{3'4'}$   | % N             | $\Delta G^\circ$ | $\Delta\Delta G^\circ$ | $^3J_{1'2'}$            | $^3J_{2'3'}$     | $^3J_{3'4'}$   | % N             | $\Delta G^\circ$ | $\Delta\Delta G^\circ$ |
| ApG<br>(1) | Ap | 4.4                    | - <sup>h</sup>   | - <sup>h</sup> | 51 <sup>g</sup> | -0.1             | -1.4                   | 4.6                    | 4.6            | 4.7            | 54              | -0.4             | -3.6                   | 5.2                     | 5.0 <sup>d</sup> | 4.2            | 46              | 0.4              | -2.8 <sup>k</sup>      |
|            | pG | 4.8                    | 5.1              | 5.1            | 49              | 0.1              |                        | 4.5                    | 5.1            | 5.3            | 53              | -0.3             |                        | 4.7                     | 5.3              | 5.0            | 49              | 0.1              |                        |
| GpA<br>(2) | Gp | 4.0                    | 5.0 <sup>d</sup> | 5.4            | 59              | -0.9             | -0.9 <sup>k</sup>      | 4.4                    | 5.0            | 5.3            | 56              | -0.6             | -3.2                   | 6.2                     | 5.0 <sup>d</sup> | 2.6            | 25              | 2.7              | -1.7                   |
|            | pA | 4.1                    | 5.2              | 5.3            | 56              | -0.6             |                        | 4.5                    | 5.0            | 5.5            | 53              | -0.3             |                        | 5.1                     | 5.3              | 4.7            | 43              | 0.7              |                        |
| ApU<br>(3) | Ap | 4.8                    | 5.0              | 4.7            | 46              | 0.4              | -0.9                   | 4.2                    | 4.9            | 5.3            | 54              | -0.4             | -3.6                   | 5.2                     | 5.1              | 5.2            | 46              | 0.4              | -2.8 <sup>k</sup>      |
|            | pU | 3.7                    | - <sup>h</sup>   | - <sup>h</sup> | 61 <sup>g</sup> | -1.1             |                        | 3.5                    | - <sup>h</sup> | - <sup>h</sup> | 64 <sup>g</sup> | -1.4             |                        | 3.9                     | - <sup>h</sup>   | - <sup>h</sup> | 58 <sup>g</sup> | -0.7             |                        |
| UpA<br>(4) | Up | 5.0                    | 5.2              | 5.0            | 45              | 0.5              | -0.3 <sup>k</sup>      | 4.6                    | 5.3            | 5.4            | 50              | 0.0              | -0.8                   | 5.5                     | 4.8              | 5.4            | 45              | 0.5              | -0.7                   |
|            | pA | 4.6                    | 5.0              | 5.1            | 53              | -0.3             |                        | 4.8                    | 5.2            | 5.0            | 51              | -0.1             |                        | 5.2                     | 4.8              | 4.9            | 47              | 0.3              |                        |
| UpC<br>(5) | Up | 4.9                    | 5.2              | 5.2            | 47              | 0.3              | -0.5 <sup>k</sup>      | 3.9                    | 5.3            | 5.7            | 57              | -0.7             | -1.5                   | 4.8                     | 5.3              | 5.5            | 49              | 0.1              | -1.1                   |
|            | pC | 3.2                    | - <sup>h</sup>   | - <sup>h</sup> | 68 <sup>g</sup> | -1.8             |                        | 3.4                    | 5.3            | - <sup>h</sup> | 65 <sup>g</sup> | -1.5             |                        | 3.8                     | 5.4              | 5.5            | 59              | -0.9             |                        |
| CpU<br>(6) | Cp | 3.8                    | 5.2              | 6.2            | 67              | -1.7             | -1.1                   | 3.5                    | 5.1            | 6.0            | 67              | -1.7             | -1.9                   | 3.5                     | 5.2              | 6.4            | 70              | -2.1             | -2.3 <sup>k</sup>      |
|            | pU | 3.7                    | 5.1              | - <sup>h</sup> | 61 <sup>g</sup> | -1.1             |                        | 2.6                    | 5.0            | - <sup>h</sup> | 77 <sup>g</sup> | -3.0             |                        | 2.5                     | 4.9              | 6.3            | 78              | -3.1             |                        |
| ApEt (7)   |    | 5.7                    | 5.3              | 3.9            | 37              | 1.3              | -                      | 6.8                    | 5.3            | 2.7            | 21              | 3.2              | -                      | - <sup>e</sup>          | - <sup>e</sup>   | - <sup>e</sup> | - <sup>e</sup>  | - <sup>e</sup>   | -                      |
| GpEt (8)   |    | - <sup>e</sup>         | - <sup>e</sup>   | - <sup>e</sup> | 50 <sup>f</sup> | 0.0 <sup>f</sup> | -                      | 6.5                    | 5.3            | 3.1            | 26              | 2.6              | -                      | 7.3                     | 5.3              | 2.1            | 14              | 4.4              | -                      |
| UpEt (9)   |    | - <sup>e</sup>         | - <sup>e</sup>   | - <sup>e</sup> | - <sup>e</sup>  | - <sup>e</sup>   | -                      | 5.3                    | 5.3            | 4.8            | 42              | 0.8              | -                      | 5.6                     | 5.4              | 4.6            | 38              | 1.2              | -                      |
| CpEt (10)  |    | 4.1                    | 5.2              | 5.7            | 56              | -0.6             | -                      | 4.8                    | 5.3            | 5.3            | 48              | 0.2              | -                      | - <sup>e</sup>          | - <sup>e</sup>   | - <sup>e</sup> | - <sup>e</sup>  | - <sup>e</sup>   | -                      |

<sup>a</sup>calculated using DAISY simulation program package (supplied by Bruker Spectrospin, Germany) of the experimental  $^1\text{H}$  NMR spectra. <sup>b</sup>calculated using PSEUROT<sup>4-</sup>

<sup>6</sup> (see the experimental section for details). The negative  $\Delta G_{\text{N/S}(298\text{ K})}^\circ$  implies relatively more N-type conformational population, so more stabilization due to stacking. <sup>c</sup>

The stacking free energy [ $\Delta\Delta G^\circ \equiv \Delta G_{\text{Stacking}}^\circ$ , in  $\text{kJ mol}^{-1}$ ] has been calculated by [ $\Delta G_{\text{N/S}(298\text{ K})}^\circ$ ]<sub>dimer</sub> - [ $\Delta G_{\text{N/S}(298\text{ K})}^\circ$ ]<sub>monomer</sub> (see Experimental section for details).

<sup>d</sup>Due to the spectral overlap with HOD signal at these pH, we have taken values by extrapolation from nearest available pH. <sup>e</sup>No NMR experiments have been performed as there is no pronation/deprotonation site at such pH range. <sup>f</sup>value for EtpGpEt (see ref. 5) has been used as 5'-ethylphosphate has very little conformational effect on sugar geometry<sup>6</sup>, so can be ignored. <sup>g</sup>%N ( $\pm 3.0$ ) has been calculated by %N = 100\*(7.9 -  $^3J_{1'2'}$ )/6.9] due to unavailability of all  $^3J_{\text{HH}}$  no PSEUROT could be performed. <sup>h</sup>No simulation of the spectra could be performed due to either spectral overlapping or overlap with HOD signal. <sup>k</sup> $\Delta\Delta G^\circ$  has been calculated using

[ $\Delta G_{\text{N/S}(298\text{ K})}^\circ$ ]<sub>monomer</sub> at pH = 6.6.

**Table S2.** PSEUROT (v5.4) calculations<sup>a</sup> based on  $^3J_{\text{HH}}$  at acidic (pH = 1.9), neutral (pH = 6.6) and alkaline (pH = 10.3) state for **1** – **10** in D<sub>2</sub>O.

| Compd.    |    | pH = 1.9 ( ± 0.1) |                                |                |                                |                |                  | pH = 6.6 ( ± 0.1) |                                |                |                                |                |                  | pH = 10.3 ( ± 0.1) |                                |                |                                |                |                  |
|-----------|----|-------------------|--------------------------------|----------------|--------------------------------|----------------|------------------|-------------------|--------------------------------|----------------|--------------------------------|----------------|------------------|--------------------|--------------------------------|----------------|--------------------------------|----------------|------------------|
|           |    | $P_{\text{N}}$    | $[\Psi_{\text{m}}]_{\text{N}}$ | $P_{\text{S}}$ | $[\Psi_{\text{m}}]_{\text{S}}$ | %S             | rms <sup>d</sup> | $P_{\text{N}}$    | $[\Psi_{\text{m}}]_{\text{N}}$ | $P_{\text{S}}$ | $[\Psi_{\text{m}}]_{\text{S}}$ | %S             | rms <sup>d</sup> | $P_{\text{N}}$     | $[\Psi_{\text{m}}]_{\text{N}}$ | $P_{\text{S}}$ | $[\Psi_{\text{m}}]_{\text{S}}$ | %S             | rms <sup>d</sup> |
| ApG       | Ap | – <sup>b</sup>    | – <sup>b</sup>                 | – <sup>b</sup> | – <sup>b</sup>                 | – <sup>b</sup> | – <sup>b</sup>   | -15               | 40                             | 141            | 40                             | 46             | ±0.1             | -15                | 40                             | 141            | 40                             | 54             | ±0.1             |
| (1)       | pG | -11               | 39                             | 131            | 39                             | 51             | ±0.1             | -11               | 39                             | 131            | 39                             | 47             | ±0.1             | -11                | 39                             | 131            | 39                             | 51             | ±0.1             |
| GpA       | Gp | 34                | 36                             | 175            | 36                             | 41             | ±0.1             | 34                | 36                             | 175            | 36                             | 44             | ±0.1             | 34                 | 36                             | 175            | 36                             | 75             | ±0.1             |
| (2)       | pA | 7                 | 36                             | 138            | 36                             | 45             | ±0.1             | 7                 | 36                             | 138            | 36                             | 47             | ±0.1             | 7                  | 36                             | 138            | 36                             | 57             | ±0.1             |
| ApU       | Ap | 5                 | 37                             | 139            | 37                             | 54             | ±0.1             | 5                 | 37                             | 139            | 37                             | 46             | ±0.1             | 5                  | 37                             | 139            | 37                             | 54             | ±0.1             |
| (3)       | pU | – <sup>b</sup>    | – <sup>b</sup>                 | – <sup>b</sup> | – <sup>b</sup>                 | – <sup>b</sup> | – <sup>b</sup>   | – <sup>b</sup>    | – <sup>b</sup>                 | – <sup>b</sup> | – <sup>b</sup>                 | – <sup>b</sup> | – <sup>b</sup>   | – <sup>b</sup>     | – <sup>b</sup>                 | – <sup>b</sup> | – <sup>b</sup>                 | – <sup>b</sup> | – <sup>b</sup>   |
| UpA       | Up | 15                | 37                             | 135            | 37                             | 55             | ±0.1             | 15                | 37                             | 135            | 37                             | 50             | ±0.1             | 15                 | 37                             | 135            | 37                             | 55             | ±0.1             |
| (4)       | pA | -16               | 41                             | 131            | 41                             | 47             | ±0.1             | -16               | 41                             | 131            | 41                             | 49             | ±0.1             | -16                | 41                             | 131            | 41                             | 53             | ±0.1             |
| UpC       | Up | 15                | 36                             | 135            | 36                             | 53             | ±0.1             | 15                | 36                             | 135            | 36                             | 43             | ±0.1             | 15                 | 36                             | 135            | 36                             | 51             | ±0.1             |
| (5)       | pC | – <sup>b</sup>    | – <sup>b</sup>                 | – <sup>b</sup> | – <sup>b</sup>                 | – <sup>b</sup> | – <sup>b</sup>   | – <sup>b</sup>    | – <sup>b</sup>                 | – <sup>b</sup> | – <sup>b</sup>                 | – <sup>b</sup> | – <sup>b</sup>   | – <sup>b</sup>     | – <sup>b</sup>                 | – <sup>b</sup> | – <sup>b</sup>                 | – <sup>b</sup> | – <sup>b</sup>   |
| CpU       | Cp | 39                | 35                             | 180            | 37                             | 33             | ±0.1             | 39                | 35                             | 180            | 37                             | 33             | ±0.1             | 39                 | 35                             | 180            | 37                             | 30             | ±0.1             |
| (6)       | pU | – <sup>b</sup>    | – <sup>b</sup>                 | – <sup>b</sup> | – <sup>b</sup>                 | – <sup>b</sup> | – <sup>b</sup>   | – <sup>b</sup>    | – <sup>b</sup>                 | – <sup>b</sup> | – <sup>b</sup>                 | – <sup>b</sup> | – <sup>b</sup>   | – <sup>b</sup>     | – <sup>b</sup>                 | – <sup>b</sup> | – <sup>b</sup>                 | – <sup>b</sup> | – <sup>b</sup>   |
| ApEt (7)  |    | 23                | 35                             | 152            | 35                             | 63             | ±0.1             | 23                | 35                             | 152            | 35                             | 79             | ±0.1             | – <sup>c</sup>     | – <sup>c</sup>                 | – <sup>c</sup> | – <sup>c</sup>                 | – <sup>c</sup> | – <sup>c</sup>   |
| GpEt (8)  |    | – <sup>c</sup>    | – <sup>c</sup>                 | – <sup>c</sup> | – <sup>c</sup>                 | – <sup>c</sup> | – <sup>c</sup>   | 23                | 35                             | 154            | 35                             | 74             | ±0.1             | 23                 | 35                             | 154            | 35                             | 86             | ±0.1             |
| UpEt (9)  |    | – <sup>c</sup>    | – <sup>c</sup>                 | – <sup>c</sup> | – <sup>c</sup>                 | – <sup>c</sup> | – <sup>c</sup>   | 10                | 37                             | 135            | 37                             | 58             | ±0.1             | 10                 | 37                             | 135            | 37                             | 62             | ±0.1             |
| CpEt (10) |    | 13                | 36                             | 134            | 36                             | 44             | ±0.1             | 13                | 36                             | 134            | 36                             | 52             | ±0.1             | – <sup>c</sup>     | – <sup>c</sup>                 | – <sup>c</sup> | – <sup>c</sup>                 | – <sup>c</sup> | – <sup>c</sup>   |

<sup>a</sup> pH-dependent  $^3J_{\text{HH}}$  at 298 K. See the experimental section for details of PSEUROT methodology. Geometries of the pentose moieties have been defined by puckering amplitudes and pseudorotational angle<sup>6</sup> for N-type ( $P_{\text{N}}$  and  $[\Psi_{\text{m}}]_{\text{N}}$ ) and S-type conformer ( $P_{\text{S}}$  and  $[\Psi_{\text{m}}]_{\text{S}}$ ). During several PSEUROT optimizations  $[\Psi_{\text{m}}]_{\text{N}}$  and  $[\Psi_{\text{m}}]_{\text{S}}$  were initially kept fixed to identical values in the range from 27° to 45° for **1** – **10** and surveyed the conformational hyperspace for N- and S-type pseudorotamers, in 1° steps. For **7** – **9** at neutral and alkaline pH,  $P_{\text{N}}$  and  $[\Psi_{\text{m}}]_{\text{N}}$  (minor conformers, mole fraction ≤ 70%) were kept fixed. <sup>b</sup> Due to the non-availability of endocyclic  $^3J_{\text{HH}}$ , PSEUROT could not be performed. <sup>c</sup> No NMR experiments have been performed (See Table S1). <sup>d</sup> The overall rms of the PSEUROT calculations. The error estimates have been assessed in terms of  $\Delta J_{\text{max}}$  and r.m.s. (see experimental section for details) having  $\Delta J_{\text{max}}$  and r.m.s. values ≤ 0.4 and ≤ 0.3 Hz respectively.



**Table S3.**  $^1\text{H}$  chemical shifts<sup>a</sup> as well as the dimerisation shifts<sup>b</sup> (shown in parenthesis) for aromatic protons of compounds **1** – **10** at three different pHs as specified below.

| Compd.     |    | pH = 1.9 ( $\pm 0.1$ )        |                               |                                 |                                  | pH = 6.6 ( $\pm 0.1$ )         |                               |                               |                                | pH = 10.3 ( $\pm 0.1$ )         |                                 |                                 |                                 |
|------------|----|-------------------------------|-------------------------------|---------------------------------|----------------------------------|--------------------------------|-------------------------------|-------------------------------|--------------------------------|---------------------------------|---------------------------------|---------------------------------|---------------------------------|
|            |    | $\delta\text{H8}$             | $\delta\text{H2}$             | $\delta\text{H5}$               | $\delta\text{H6}$                | $\delta\text{H8}$              | $\delta\text{H2}$             | $\delta\text{H5}$             | $\delta\text{H6}$              | $\delta\text{H8}$               | $\delta\text{H2}$               | $\delta\text{H5}$               | $\delta\text{H6}$               |
| ApG<br>(1) | Ap | 8.526<br>(0.052) <sup>b</sup> | 8.436<br>(0.036) <sup>b</sup> | -                               | -                                | 8.262<br>(0.092) <sup>b</sup>  | 8.153<br>(0.117) <sup>b</sup> | -                             | -                              | 8.268<br>(0.086) <sup>b,c</sup> | 8.180<br>(0.09) <sup>b,c</sup>  | -                               | -                               |
|            | pG | 8.626                         | -                             | -                               | -                                | 7.942                          | -                             | -                             | -                              | 7.868                           | -                               | -                               | -                               |
| GpA<br>(2) | Gp | 8.382<br>(0.132) <sup>b</sup> | -                             | -                               | -                                | 7.913<br>(0.097) <sup>b</sup>  | -                             | -                             | -                              | 7.775<br>(0.09) <sup>b</sup>    | -                               | -                               | -                               |
|            | pA | 8.544                         | 8.456                         | -                               | -                                | 8.344                          | 8.206                         | -                             | -                              | 8.399                           | 8.210                           | -                               | -                               |
| ApU<br>(3) | Ap | 8.567<br>(0.011) <sup>b</sup> | 8.449<br>(0.023) <sup>b</sup> | -                               | -                                | 8.362<br>(-0.008) <sup>b</sup> | 8.222<br>(0.048) <sup>b</sup> | -                             | -                              | 8.342<br>(0.012) <sup>b,c</sup> | 8.228<br>(0.042) <sup>b,c</sup> | -                               | -                               |
|            | pU | -                             | -                             | 5.789                           | 7.853                            | -                              | -                             | 5.638                         | 7.767                          | -                               | -                               | 5.653                           | 7.649                           |
| UpA<br>(4) | Up | -                             | -                             | 5.831<br>(0.087) <sup>b,c</sup> | 7.833<br>(0.051) <sup>b,c</sup>  | -                              | -                             | 5.731<br>(0.187) <sup>b</sup> | 7.751<br>(0.133) <sup>b</sup>  | -                               | -                               | 5.843<br>(-0.005) <sup>b</sup>  | 7.534<br>(0.177) <sup>b</sup>   |
|            | pA | 8.604                         | 8.451                         | -                               | -                                | 8.435                          | 8.256                         | -                             | -                              | 8.438                           | 8.258                           | -                               | -                               |
| UpC<br>(5) | Up | -                             | -                             | 5.891<br>(0.027) <sup>b,c</sup> | 7.916<br>(-0.032) <sup>b,c</sup> | -                              | -                             | 5.858<br>(0.06) <sup>b</sup>  | 7.919<br>(-0.035) <sup>b</sup> | -                               | -                               | 5.794<br>(0.044) <sup>b</sup>   | 7.689<br>(0.022) <sup>b</sup>   |
|            | pC | -                             | -                             | 6.273                           | 8.178                            | -                              | -                             | 6.024                         | 7.935                          | -                               | -                               | 6.046                           | 7.901                           |
| CpU<br>(6) | Cp | -                             | -                             | 6.231<br>(0.027) <sup>b</sup>   | 8.191<br>(-0.022) <sup>b</sup>   | -                              | -                             | 5.970<br>(0.099) <sup>b</sup> | 7.902<br>(-0.054) <sup>b</sup> | -                               | -                               | 5.924<br>(0.145) <sup>b,c</sup> | 7.836<br>(0.012) <sup>b,c</sup> |
|            | pU | -                             | -                             | 5.889                           | 7.917                            | -                              | -                             | 5.816                         | 7.930                          | -                               | -                               | 5.767                           | 7.792                           |
| ApEt (7)   |    | 8.578                         | 8.472                         | -                               | -                                | 8.354                          | 8.270                         | -                             | -                              | -                               | -                               | -                               | -                               |
| GpEt (8)   |    | 8.514                         | -                             | -                               | -                                | 8.010                          | -                             | -                             | -                              | 7.865                           | -                               | -                               | -                               |
| UpEt (9)   |    | -                             | -                             | -                               | -                                | -                              | -                             | 5.918                         | 7.884                          | -                               | -                               | 5.838                           | 7.711                           |
| CpEt (10)  |    | -                             | -                             | 6.258                           | 8.169                            | -                              | -                             | 6.069                         | 7.848                          | -                               | -                               | -                               | -                               |

<sup>a</sup> In ppm. <sup>b</sup> The values in parenthesis with bold, indicate the dimerisation shifts ( $\delta_{\text{NpEt}} - \delta_{\text{NpN}'}^*$ ) of the corresponding protons (See Figure S5). <sup>c</sup> dimerisation shifts ( $\delta_{\text{NpEt}} - \delta_{\text{NpN}'}^*$ ) at this pH have been calculated using  $\delta_{\text{NpEt}}$  of neutral pH assuming that there will be no change of chemical shift over the pH due to the absence of any protonation/deprotonation site at that particular pH range.
